# Supplementary material for: The proteomic profiling of calenduloside E targets in HUVEC: design, synthesis and application of biotinylated probe BCEA
Source: Royal Society of Chemistry journal article supplement (doi:10.1039/c6ra25572h), 2017-01-01
Supplement: c6ra25572h1.pdf [file c6ra25572h1.pdf]

**The proteomic profiling of Calenduloside E targets in HUVEC: Design, synthesis and application  
of biotinylated probe BCEA**

Yu Tian<sup>‡</sup>, Shan Wang<sup>‡</sup>, Hai Shang, Min Wang, Guibo Sun\*, Xudong Xu\*, and Xiaobo Sun\*

*Key Laboratory of Bioactive Substances and Resource Utilization of Chinese Herbal Medicine, Beijing*

*Key Laboratory of Innovative Drug Discovery of Traditional Chinese Medicine (Natural Medicine)*

*and Translational Medicine, Institute of Medicinal Plant Development, Chinese Academy of Medical*

*Sciences & Peking Union Medical College, Beijing, 100193, P. R. China.*

**Table 1.** Proteins identified by pull down and mass spectrometry

| #  | Accession | Description                                                                                      | Score      | Coverage | Unique Peptides | Peptides |
|----|-----------|--------------------------------------------------------------------------------------------------|------------|----------|-----------------|----------|
| 1  | P60709    | Actin, cytoplasmic 1 OS=Homo sapiens<br>GN=ACTB PE=1 SV=1 - [ACTB_HUMAN]                         | 6040.91147 | 61.6     | 7               | 21       |
| 2  | P62736    | Actin, aortic smooth muscle OS=Homo<br>sapiens GN=ACTA2 PE=1 SV=1 -<br>[ACTA_HUMAN]              | 2929.32933 | 45.36    | 2               | 17       |
| 3  | P68133    | Actin, alpha skeletal muscle OS=Homo<br>sapiens GN=ACTA1 PE=1 SV=1 -<br>[ACTS_HUMAN]             | 2853.46724 | 45.09    | 1               | 16       |
| 4  | P13645    | Keratin, type I cytoskeletal 10 OS=Homo<br>sapiens GN=KRT10 PE=1 SV=6 -<br>[K1C10_HUMAN]         | 2054.79638 | 48.63    | 29              | 33       |
| 5  | P04264    | Keratin, type II cytoskeletal 1 OS=Homo<br>sapiens GN=KRT1 PE=1 SV=6 -<br>[K2C1_HUMAN]           | 2012.39528 | 52.02    | 36              | 44       |
| 6  | P35527    | Keratin, type I cytoskeletal 9 OS=Homo<br>sapiens GN=KRT9 PE=1 SV=3 -<br>[K1C9_HUMAN]            | 1945.79566 | 57.95    | 32              | 33       |
| 7  | P35908    | Keratin, type II cytoskeletal 2 epidermal<br>OS=Homo sapiens GN=KRT2 PE=1 SV=2 -<br>[K22E_HUMAN] | 1431.86069 | 74.02    | 27              | 40       |
| 8  | P78371    | T-complex protein 1 subunit beta OS=Homo<br>sapiens GN=CCT2 PE=1 SV=4 -<br>[TCPB_HUMAN]          | 1344.90085 | 60.19    | 27              | 27       |
| 9  | Q6S8J3    | POTE ankyrin domain family member E<br>OS=Homo sapiens GN=POTEE PE=1 SV=3 -<br>[POTEE_HUMAN]     | 1261.71843 | 8.74     | 1               | 7        |
| 10 | P07237    | Protein disulfide-isomerase OS=Homo<br>sapiens GN=P4HB PE=1 SV=3 -<br>[PDIA1_HUMAN]              | 1113.46083 | 50.39    | 27              | 27       |
| 11 | A5A6J1    | Tubulin alpha-1A chain OS=Pan troglodytes<br>GN=TUBA1A PE=2 SV=1 - [TBA1A_PANTR]                 | 1107.79    | 50.11    | 6               | 19       |
| 12 | P02533    | Keratin, type I cytoskeletal 14 OS=Homo<br>sapiens GN=KRT14 PE=1 SV=4 -<br>[K1C14_HUMAN]         | 994.982775 | 51.06    | 10              | 21       |
| 13 | P30101    | Protein disulfide-isomerase A3 OS=Homo<br>sapiens GN=PDIA3 PE=1 SV=4 -<br>[PDIA3_HUMAN]          | 994.919749 | 46.14    | 29              | 29       |
| 14 | P08779    | Keratin, type I cytoskeletal 16 OS=Homo<br>sapiens GN=KRT16 PE=1 SV=4 -<br>[K1C16_HUMAN]         | 985.13957  | 52.22    | 14              | 23       |

|    |        |                                                                                                          |            |       |    |    |
|----|--------|----------------------------------------------------------------------------------------------------------|------------|-------|----|----|
| 15 | P08670 | Vimentin OS=Homo sapiens GN=VIM PE=1<br>SV=4 - [VIME_HUMAN]                                              | 924.846574 | 59.44 | 29 | 29 |
| 16 | P13647 | Keratin, type II cytoskeletal 5 OS=Homo<br>sapiens GN=KRT5 PE=1 SV=3 -<br>[K2C5_HUMAN]                   | 891.527994 | 51.69 | 23 | 37 |
| 17 | P26599 | Polypyrimidine tract-binding protein 1<br>OS=Homo sapiens GN=PTBP1 PE=1 SV=1 -<br>[PTBP1_HUMAN]          | 861.020569 | 53.67 | 19 | 19 |
| 18 | P68366 | Tubulin alpha-4A chain OS=Homo sapiens<br>GN=TUBA4A PE=1 SV=1 - [TBA4A_HUMAN]                            | 762.614317 | 39.29 | 3  | 16 |
| 19 | P17987 | T-complex protein 1 subunit alpha OS=Homo<br>sapiens GN=TCP1 PE=1 SV=1 -<br>[TCPA_HUMAN]                 | 684.046168 | 42.09 | 19 | 19 |
| 20 | P04259 | Keratin, type II cytoskeletal 6B OS=Homo<br>sapiens GN=KRT6B PE=1 SV=5 -<br>[K2C6B_HUMAN]                | 641.033903 | 50.53 | 5  | 35 |
| 21 | Q15233 | Non-POU domain-containing octamer-binding<br>protein OS=Homo sapiens GN=NONO PE=1<br>SV=4 - [NONO_HUMAN] | 597.11516  | 31.85 | 11 | 13 |
| 22 | P49411 | Elongation factor Tu, mitochondrial<br>OS=Homo sapiens GN=TUFM PE=1 SV=2 -<br>[EFTU_HUMAN]               | 543.591822 | 42.48 | 17 | 17 |
| 23 | P50991 | T-complex protein 1 subunit delta OS=Homo<br>sapiens GN=CCT4 PE=1 SV=4 -<br>[TCPD_HUMAN]                 | 517.144955 | 40.26 | 18 | 18 |
| 24 | P02538 | Keratin, type II cytoskeletal 6A OS=Homo<br>sapiens GN=KRT6A PE=1 SV=3 -<br>[K2C6A_HUMAN]                | 501.244589 | 45.92 | 2  | 33 |
| 25 | Q01518 | Adenylyl cyclase-associated protein 1<br>OS=Homo sapiens GN=CAP1 PE=1 SV=5 -<br>[CAP1_HUMAN]             | 490.95899  | 26.32 | 12 | 12 |
| 26 | Q99832 | T-complex protein 1 subunit eta OS=Homo<br>sapiens GN=CCT7 PE=1 SV=2 -<br>[TCPH_HUMAN]                   | 440.085879 | 34.81 | 18 | 18 |
| 27 | P50990 | T-complex protein 1 subunit theta OS=Homo<br>sapiens GN=CCT8 PE=1 SV=4 -<br>[TCPQ_HUMAN]                 | 421.271811 | 40.88 | 22 | 22 |
| 28 | P14618 | Pyruvate kinase PKM OS=Homo sapiens<br>GN=PKM PE=1 SV=4 - [KPYM_HUMAN]                                   | 410.30579  | 38.79 | 20 | 20 |
| 29 | P12268 | Inosine-5'-monophosphate dehydrogenase 2<br>OS=Homo sapiens GN=IMPDH2 PE=1 SV=2<br>- [IMDH2_HUMAN]       | 409.289909 | 30.35 | 13 | 14 |
| 30 | Q9Y3I0 | tRNA-splicing ligase RtcB homolog OS=Homo<br>sapiens GN=RTCB PE=1 SV=1 -                                 | 406.877862 | 35.64 | 17 | 17 |

|    |        |                                                                                                  |            |       |    |    |  |
|----|--------|--------------------------------------------------------------------------------------------------|------------|-------|----|----|--|
|    |        | [RTCB_HUMAN]                                                                                     |            |       |    |    |  |
|    |        | Synaptic vesicle membrane protein VAT-1                                                          |            |       |    |    |  |
| 31 | Q99536 | homolog OS=Homo sapiens GN=VAT1 PE=1 SV=2 - [VAT1_HUMAN]                                         | 406.121388 | 36.13 | 10 | 10 |  |
|    |        | Tubulin beta-3 chain OS=Homo sapiens GN=TUBB3 PE=1 SV=2 - [TBB3_HUMAN]                           | 405.726725 | 24.67 | 1  | 10 |  |
| 32 | Q13509 | Glucose-6-phosphate 1-dehydrogenase OS=Homo sapiens GN=G6PD PE=1 SV=4 - [G6PD_HUMAN]             | 405.402096 | 43.88 | 23 | 23 |  |
|    |        | 26S protease regulatory subunit 4 OS=Homo sapiens GN=PSMC1 PE=1 SV=1 - [PRS4_HUMAN]              | 398.524312 | 45.45 | 17 | 17 |  |
| 34 | P62191 | Tubulin beta-4B chain OS=Homo sapiens GN=TUBB4B PE=1 SV=1 - [TBB4B_HUMAN]                        | 393.597761 | 30.56 | 2  | 12 |  |
| 35 | P68371 | Interleukin enhancer-binding factor 2 OS=Homo sapiens GN=ILF2 PE=1 SV=2 - [ILF2_HUMAN]           | 389.000107 | 33.59 | 9  | 9  |  |
| 36 | Q12905 | Phosphoglycerate kinase 1 OS=Homo sapiens GN=PGK1 PE=1 SV=3 - [PGK1_HUMAN]                       | 357.963638 | 36.69 | 14 | 14 |  |
| 37 | P00558 | Hemoglobin subunit gamma-2 OS=Gorilla gorilla GN=HBG2 PE=2 SV=2 - [HBG2_GORGO]                   | 342.514757 | 51.7  | 1  | 6  |  |
| 38 | P62742 | Keratin, type I cytoskeletal 17 OS=Homo sapiens GN=KRT17 PE=1 SV=2 - [K1C17_HUMAN]               | 336.844692 | 36.34 | 8  | 15 |  |
| 39 | Q04695 | Serine hydroxymethyltransferase, mitochondrial OS=Homo sapiens GN=SHMT2 PE=1 SV=3 - [GLYM_HUMAN] | 336.016905 | 30.75 | 14 | 14 |  |
| 40 | P34897 | Tubulin beta-6 chain OS=Homo sapiens GN=TUBB6 PE=1 SV=1 - [TBB6_HUMAN]                           | 318.570917 | 23.09 | 4  | 9  |  |
| 41 | Q9BUF5 | Histone H1.2 OS=Homo sapiens GN=HIST1H1C PE=1 SV=2 - [H12_HUMAN]                                 | 314.470172 | 23.47 | 7  | 7  |  |
| 42 | P16403 | RNA-binding motif protein, X chromosome OS=Homo sapiens GN=RBMX PE=1 SV=3 - [RBMX_HUMAN]         | 298.806916 | 23.02 | 9  | 9  |  |
| 43 | P38159 | Hemoglobin subunit gamma-1 OS=Homo sapiens GN=HBG1 PE=1 SV=2 - [HBG1_HUMAN]                      | 296.165713 | 51.7  | 1  | 6  |  |
| 44 | P69891 | Nucleosome assembly protein 1-like 4 OS=Homo sapiens GN=NAP1L4 PE=1 SV=1 - [NP1L4_HUMAN]         | 294.576959 | 25.6  | 7  | 8  |  |
| 45 | Q99733 | DnaJ homolog subfamily C member 7 OS=Homo sapiens GN=DNAJC7 PE=1 SV=2                            | 289.011043 | 29.76 | 16 | 16 |  |
| 46 | Q99615 |                                                                                                  |            |       |    |    |  |

|    |        |                                                                                     |            |       |    |    |
|----|--------|-------------------------------------------------------------------------------------|------------|-------|----|----|
|    |        | - [DNJC7_HUMAN]                                                                     |            |       |    |    |
|    |        | Heat shock cognate 71 kDa protein                                                   |            |       |    |    |
| 47 | P11142 | OS=Homo sapiens GN=HSPA8 PE=1 SV=1 -<br>[HSP7C_HUMAN]                               | 284.441213 | 32.66 | 11 | 17 |
|    |        | Tryptophan--tRNA ligase, cytoplasmic                                                |            |       |    |    |
| 48 | P23381 | OS=Homo sapiens GN=WARS PE=1 SV=2 -<br>[SYWC_HUMAN]                                 | 282.27328  | 29.3  | 12 | 12 |
|    |        | 26S proteasome non-ATPase regulatory                                                |            |       |    |    |
| 49 | O00231 | subunit 11 OS=Homo sapiens GN=PSMD11<br>PE=1 SV=3 - [PSD11_HUMAN]                   | 278.902301 | 46.68 | 17 | 17 |
|    |        | Mitochondrial import inner membrane                                                 |            |       |    |    |
| 50 | O43615 | translocase subunit TIM44 OS=Homo<br>sapiens GN=TIMM44 PE=1 SV=2 -<br>[TIM44_HUMAN] | 272.278598 | 20.8  | 9  | 9  |
|    |        | Atlastin-3 OS=Homo sapiens GN=ATL3 PE=1<br>SV=1 - [ATLA3_HUMAN]                     |            |       |    |    |
| 51 | Q6DD88 | 268.244498                                                                          | 34.2       | 16    | 16 |    |
|    |        | Eukaryotic initiation factor 4A-I OS=Homo                                           |            |       |    |    |
| 52 | P60842 | sapiens GN=EIF4A1 PE=1 SV=1 -<br>[IF4A1_HUMAN]                                      | 259.169911 | 41.38 | 12 | 13 |
|    |        | Nicalin OS=Homo sapiens GN=NCLN PE=1<br>SV=2 - [NCLN_HUMAN]                         |            |       |    |    |
| 53 | Q969V3 | 257.065907                                                                          | 21.14      | 10    | 10 |    |
|    |        | Isocitrate dehydrogenase [NADP],                                                    |            |       |    |    |
| 54 | P48735 | mitochondrial OS=Homo sapiens GN=IDH2<br>PE=1 SV=2 - [IDHP_HUMAN]                   | 256.14654  | 30.53 | 13 | 14 |
|    |        | Heterogeneous nuclear ribonucleoprotein M                                           |            |       |    |    |
| 55 | P52272 | OS=Homo sapiens GN=HNRNPM PE=1 SV=3<br>- [HNRPM_HUMAN]                              | 255.887966 | 29.59 | 20 | 20 |
|    |        | F-box-like/WD repeat-containing protein                                             |            |       |    |    |
| 56 | Q9BZK7 | TBL1XR1 OS=Homo sapiens GN=TBL1XR1<br>PE=1 SV=1 - [TBL1R_HUMAN]                     | 255.1515   | 25.68 | 9  | 9  |
|    |        | Nuclear pore complex protein Nup50                                                  |            |       |    |    |
| 57 | Q9UKX7 | OS=Homo sapiens GN=NUP50 PE=1 SV=2 -<br>[NUP50_HUMAN]                               | 254.846953 | 29.91 | 10 | 10 |
|    |        | Cytochrome b-c1 complex subunit 2,                                                  |            |       |    |    |
| 58 | P22695 | mitochondrial OS=Homo sapiens<br>GN=UQCRC2 PE=1 SV=3 - [QCR2_HUMAN]                 | 253.955177 | 34.66 | 11 | 11 |
|    |        | Glutaminase kidney isoform, mitochondrial                                           |            |       |    |    |
| 59 | O94925 | OS=Homo sapiens GN=GLS PE=1 SV=1 -<br>[GLSK_HUMAN]                                  | 252.69173  | 18.39 | 9  | 9  |
|    |        | Nuclear migration protein nudC OS=Homo                                              |            |       |    |    |
| 60 | Q9Y266 | sapiens GN=NUDC PE=1 SV=1 -<br>[NUDC_HUMAN]                                         | 248.253512 | 45.02 | 15 | 15 |
|    |        | Protein ERGIC-53 OS=Homo sapiens                                                    |            |       |    |    |
| 61 | P49257 | GN=LMAN1 PE=1 SV=2 - [LMAN1_HUMAN]                                                  | 247.504589 | 26.08 | 11 | 11 |

|    |        |                                                        |            |       |    |    |  |
|----|--------|--------------------------------------------------------|------------|-------|----|----|--|
|    |        | Protein disulfide-isomerase TMX3 OS=Homo               |            |       |    |    |  |
| 62 | Q96JJ7 | sapiens GN=TMX3 PE=1 SV=2 -<br>[TMX3_HUMAN]            | 244.410771 | 17.62 | 7  | 7  |  |
|    |        | Signal recognition particle 54 kDa protein             |            |       |    |    |  |
| 63 | P61011 | OS=Homo sapiens GN=SRP54 PE=1 SV=1 -<br>[SRP54_HUMAN]  | 244.184421 | 35.32 | 15 | 15 |  |
|    |        | Histone H1.4 OS=Homo sapiens                           |            |       |    |    |  |
| 64 | P10412 | GN=HIST1H1E PE=1 SV=2 - [H14_HUMAN]                    | 243.807004 | 26.94 | 1  | 8  |  |
|    |        | Peptidyl-prolyl cis-trans isomerase FKBP4              |            |       |    |    |  |
| 65 | Q02790 | OS=Homo sapiens GN=FKBP4 PE=1 SV=3 -<br>[FKBP4_HUMAN]  | 241.243512 | 42.05 | 16 | 16 |  |
|    |        | ATP-dependent RNA helicase DDX19A                      |            |       |    |    |  |
| 66 | Q9NUU7 | OS=Homo sapiens GN=DDX19A PE=1 SV=1<br>- [DD19A_HUMAN] | 240.471545 | 29.29 | 12 | 12 |  |
|    |        | Desmin OS=Homo sapiens GN=DES PE=1                     |            |       |    |    |  |
| 67 | P17661 | SV=3 - [DESM_HUMAN]                                    | 236.394733 | 8.72  | 1  | 6  |  |
|    |        | Importin subunit alpha-1 OS=Homo sapiens               |            |       |    |    |  |
| 68 | P52292 | GN=KPNA2 PE=1 SV=1 - [IMA1_HUMAN]                      | 233.956698 | 24.2  | 11 | 11 |  |
|    |        | D-3-phosphoglycerate dehydrogenase                     |            |       |    |    |  |
| 69 | O43175 | OS=Homo sapiens GN=PHGDH PE=1 SV=4 -<br>[SERA_HUMAN]   | 233.616565 | 23.26 | 12 | 12 |  |
|    |        | Actin, gamma-enteric smooth muscle                     |            |       |    |    |  |
| 70 | P63267 | OS=Homo sapiens GN=ACTG2 PE=1 SV=1 -<br>[ACTH_HUMAN]   | 231.482216 | 27.13 | 1  | 9  |  |
|    |        | Thioredoxin reductase 1, cytoplasmic                   |            |       |    |    |  |
| 71 | Q16881 | OS=Homo sapiens GN=TXNRD1 PE=1 SV=3<br>- [TRXR1_HUMAN] | 230.845539 | 26.35 | 14 | 14 |  |
|    |        | Serum albumin OS=Homo sapiens GN=ALB                   |            |       |    |    |  |
| 72 | P02768 | PE=1 SV=2 - [ALBU_HUMAN]                               | 227.389084 | 8.05  | 6  | 6  |  |
|    |        | RuvB-like 1 OS=Homo sapiens GN=RUVBL1                  |            |       |    |    |  |
| 73 | Q9Y265 | PE=1 SV=1 - [RUVB1_HUMAN]                              | 226.495543 | 28.95 | 9  | 9  |  |
|    |        | Cytoskeleton-associated protein 4 OS=Homo              |            |       |    |    |  |
| 74 | Q07065 | sapiens GN=CKAP4 PE=1 SV=2 -<br>[CKAP4_HUMAN]          | 226.361499 | 25.25 | 12 | 12 |  |
|    |        | Elongation factor 1-alpha 1 OS=Homo                    |            |       |    |    |  |
| 75 | P68104 | sapiens GN=EEF1A1 PE=1 SV=1 -<br>[EF1A1_HUMAN]         | 223.732217 | 20.35 | 8  | 8  |  |
|    |        | Xanthine dehydrogenase/oxidase OS=Homo                 |            |       |    |    |  |
| 76 | P47989 | sapiens GN=XDH PE=1 SV=4 -<br>[XDH_HUMAN]              | 223.300468 | 3.38  | 4  | 4  |  |
|    |        | Keratin, type II cytoskeletal 7 OS=Homo                |            |       |    |    |  |
| 77 | P08729 | sapiens GN=KRT7 PE=1 SV=5 -<br>[K2C7_HUMAN]            | 220.895059 | 15.78 | 4  | 9  |  |
| 78 | P06744 | Glucose-6-phosphate isomerase OS=Homo                  | 220.175229 | 25.81 | 13 | 13 |  |

|    |        |                                                                                                                |            |       |    |    |  |
|----|--------|----------------------------------------------------------------------------------------------------------------|------------|-------|----|----|--|
|    |        | sapiens GN=GPI PE=1 SV=4 -<br>[G6PI_HUMAN]<br>Heterogeneous nuclear ribonucleoprotein D0                       |            |       |    |    |  |
| 79 | Q14103 | OS=Homo sapiens GN=HNRNPD PE=1 SV=1<br>- [HNRPD_HUMAN]                                                         | 218.633003 | 21.69 | 8  | 8  |  |
| 80 | P50454 | Serpin H1 OS=Homo sapiens GN=SERPINH1<br>PE=1 SV=2 - [SERPH_HUMAN]<br>Serine/threonine-protein phosphatase 5   | 218.006693 | 14.35 | 5  | 5  |  |
| 81 | P53041 | OS=Homo sapiens GN=PPP5C PE=1 SV=1 -<br>[PPP5_HUMAN]<br>Fumarate hydratase, mitochondrial                      | 214.706941 | 26.45 | 12 | 12 |  |
| 82 | P07954 | OS=Homo sapiens GN=FH PE=1 SV=3 -<br>[FUMH_HUMAN]<br>Plasminogen activator inhibitor 1 RNA-                    | 212.718822 | 28.43 | 12 | 12 |  |
| 83 | Q8NC51 | binding protein OS=Homo sapiens<br>GN=SERBP1 PE=1 SV=2 - [PAIRB_HUMAN]                                         | 211.293939 | 30.88 | 13 | 13 |  |
| 84 | P02545 | Prelamin-A/C OS=Homo sapiens GN=LMNA<br>PE=1 SV=1 - [LMNA_HUMAN]<br>Dihydrolipoyl dehydrogenase, mitochondrial | 210.611224 | 16.57 | 9  | 9  |  |
| 85 | P09622 | OS=Homo sapiens GN=DLD PE=1 SV=2 -<br>[DLDH_HUMAN]<br>Succinyl-CoA ligase [GDP-forming] subunit                | 209.35169  | 22    | 11 | 11 |  |
| 86 | Q96199 | beta, mitochondrial OS=Homo sapiens<br>GN=SUCLG2 PE=1 SV=2 - [SUCB2_HUMAN]                                     | 201.920319 | 25.46 | 11 | 11 |  |
| 87 | P26196 | Probable ATP-dependent RNA helicase DDX6<br>OS=Homo sapiens GN=DDX6 PE=1 SV=2 -<br>[DDX6_HUMAN]                | 201.840848 | 23.4  | 9  | 9  |  |
| 88 | Q02413 | Desmoglein-1 OS=Homo sapiens GN=DSG1<br>PE=1 SV=2 - [DSG1_HUMAN]<br>26S protease regulatory subunit 10B        | 198.639971 | 8.29  | 7  | 7  |  |
| 89 | P62333 | OS=Homo sapiens GN=PSMC6 PE=1 SV=1 -<br>[PRS10_HUMAN]<br>Pre-mRNA-processing factor 19 OS=Homo                 | 198.32802  | 34.45 | 10 | 10 |  |
| 90 | Q9UMS4 | sapiens GN=PRPF19 PE=1 SV=1 -<br>[PRP19_HUMAN]<br>Lipoprotein lipase OS=Homo sapiens                           | 197.966523 | 24.21 | 10 | 10 |  |
| 91 | P06858 | GN=LPL PE=1 SV=1 - [LIPL_HUMAN]<br>Apoptosis inhibitor 5 OS=Homo sapiens                                       | 197.896348 | 12.63 | 4  | 4  |  |
| 92 | Q9BZZ5 | GN=API5 PE=1 SV=3 - [API5_HUMAN]<br>Double-stranded RNA-binding protein                                        | 195.504469 | 22.71 | 11 | 11 |  |
| 93 | O95793 | Staufen homolog 1 OS=Homo sapiens<br>GN=STAU1 PE=1 SV=2 - [STAU1_HUMAN]                                        | 195.321979 | 22.88 | 11 | 11 |  |
| 94 | Q6NZI2 | Polymerase I and transcript release factor<br>OS=Homo sapiens GN=PTRF PE=1 SV=1 -                              | 194.635141 | 18.97 | 5  | 5  |  |

| [PTRF_HUMAN] |        |                                                                                                                 |            |       |    |    |
|--------------|--------|-----------------------------------------------------------------------------------------------------------------|------------|-------|----|----|
| 95           | Q92769 | Histone deacetylase 2 OS=Homo sapiens<br>GN=HDAC2 PE=1 SV=2 - [HDAC2_HUMAN]                                     | 189.551071 | 15.98 | 6  | 6  |
| 96           | P49419 | Alpha-aminoadipic semialdehyde<br>dehydrogenase OS=Homo sapiens<br>GN=ALDH7A1 PE=1 SV=5 -<br>[AL7A1_HUMAN]      | 186.554963 | 20.59 | 9  | 9  |
| 97           | Q7Z794 | Keratin, type II cytoskeletal 1b OS=Homo<br>sapiens GN=KRT77 PE=2 SV=3 -<br>[K2C1B_HUMAN]                       | 185.187981 | 12.8  | 4  | 9  |
| 98           | P10809 | 60 kDa heat shock protein, mitochondrial<br>OS=Homo sapiens GN=HSPD1 PE=1 SV=2 -<br>[CH60_HUMAN]                | 182.965438 | 20.59 | 10 | 10 |
| 99           | P19338 | Nucleolin OS=Homo sapiens GN=NCL PE=1<br>SV=3 - [NUCL_HUMAN]                                                    | 182.622138 | 15.92 | 10 | 10 |
| 100          | O60832 | H/ACA ribonucleoprotein complex subunit 4<br>OS=Homo sapiens GN=DKC1 PE=1 SV=3 -<br>[DKC1_HUMAN]                | 182.356273 | 15.37 | 8  | 8  |
| 101          | P08238 | Heat shock protein HSP 90-beta OS=Homo<br>sapiens GN=HSP90AB1 PE=1 SV=4 -<br>[HS90B_HUMAN]                      | 181.101305 | 13.67 | 2  | 10 |
| 102          | P54727 | UV excision repair protein RAD23 homolog B<br>OS=Homo sapiens GN=RAD23B PE=1 SV=1<br>- [RD23B_HUMAN]            | 178.808731 | 17.6  | 7  | 7  |
| 103          | Q02818 | Nucleobindin-1 OS=Homo sapiens<br>GN=NUCB1 PE=1 SV=4 - [NUCB1_HUMAN]                                            | 177.548494 | 17.79 | 9  | 9  |
| 104          | P16401 | Histone H1.5 OS=Homo sapiens<br>GN=HIST1H1B PE=1 SV=3 - [H15_HUMAN]                                             | 175.634991 | 17.7  | 4  | 4  |
| 105          | Q13217 | DnaJ homolog subfamily C member 3<br>OS=Homo sapiens GN=DNAJC3 PE=1 SV=1<br>- [DNJC3_HUMAN]                     | 173.130054 | 15.48 | 10 | 10 |
| 106          | P48681 | Nestin OS=Homo sapiens GN=NES PE=1<br>SV=2 - [NEST_HUMAN]                                                       | 172.684501 | 4.44  | 6  | 6  |
| 107          | Q9UQ80 | Proliferation-associated protein 2G4<br>OS=Homo sapiens GN=PA2G4 PE=1 SV=3 -<br>[PA2G4_HUMAN]                   | 169.231018 | 34.77 | 12 | 12 |
| 108          | Q16555 | Dihydropyrimidinase-related protein 2<br>OS=Homo sapiens GN=DPYSL2 PE=1 SV=1<br>- [DPYL2_HUMAN]                 | 165.988862 | 18.88 | 7  | 7  |
| 109          | P01892 | HLA class I histocompatibility antigen, A-2<br>alpha chain OS=Homo sapiens GN=HLA-A<br>PE=1 SV=1 - [1A02_HUMAN] | 164.16904  | 27.67 | 1  | 7  |
| 110          | Q2TAY7 | WD40 repeat-containing protein SMU1<br>OS=Homo sapiens GN=SMU1 PE=1 SV=2 -                                      | 164.124394 | 13.26 | 6  | 6  |



| [SMU1_HUMAN] |        |                                                                                                                   |            |       |    |    |
|--------------|--------|-------------------------------------------------------------------------------------------------------------------|------------|-------|----|----|
| 111          | P08865 | 40S ribosomal protein SA OS=Homo sapiens<br>GN=RPSA PE=1 SV=4 - [RSSA_HUMAN]                                      | 163.451782 | 20.68 | 4  | 4  |
| 112          | P16190 | HLA class I histocompatibility antigen, A-33<br>alpha chain OS=Homo sapiens GN=HLA-A<br>PE=1 SV=3 - [1A33_HUMAN]  | 163.031243 | 27.12 | 0  | 7  |
| 113          | P18462 | HLA class I histocompatibility antigen, A-25<br>alpha chain OS=Homo sapiens GN=HLA-A<br>PE=1 SV=1 - [1A25_HUMAN]  | 163.031243 | 27.12 | 0  | 7  |
| 114          | P50552 | Vasodilator-stimulated phosphoprotein<br>OS=Homo sapiens GN=VASP PE=1 SV=3 -<br>[VASP_HUMAN]                      | 162.018468 | 20    | 6  | 6  |
| 115          | Q01546 | Keratin, type II cytoskeletal 2 oral OS=Homo<br>sapiens GN=KRT76 PE=1 SV=2 -<br>[K220_HUMAN]                      | 161.557517 | 12.7  | 1  | 12 |
| 116          | P16189 | HLA class I histocompatibility antigen, A-31<br>alpha chain OS=Homo sapiens GN=HLA-A<br>PE=1 SV=2 - [1A31_HUMAN]  | 161.254393 | 26.3  | 0  | 7  |
| 117          | P21281 | V-type proton ATPase subunit B, brain<br>isoform OS=Homo sapiens GN=ATP6V1B2<br>PE=1 SV=3 - [VATB2_HUMAN]         | 160.736933 | 23.09 | 10 | 10 |
| 118          | O43172 | U4/U6 small nuclear ribonucleoprotein Prp4<br>OS=Homo sapiens GN=PRPF4 PE=1 SV=2 -<br>[PRP4_HUMAN]                | 159.694163 | 19.16 | 9  | 9  |
| 119          | O75874 | Isocitrate dehydrogenase [NADP]<br>cytoplasmic OS=Homo sapiens GN=IDH1<br>PE=1 SV=2 - [IDHC_HUMAN]                | 158.444573 | 37.68 | 12 | 13 |
| 120          | Q5JTV8 | Torsin-1A-interacting protein 1 OS=Homo<br>sapiens GN=TOR1AIP1 PE=1 SV=2 -<br>[TOIP1_HUMAN]                       | 157.224551 | 24.53 | 10 | 10 |
| 121          | P68871 | Hemoglobin subunit beta OS=Homo sapiens<br>GN=HBB PE=1 SV=2 - [HBB_HUMAN]                                         | 155.665221 | 51.02 | 5  | 6  |
| 122          | O75390 | Citrate synthase, mitochondrial OS=Homo<br>sapiens GN=CS PE=1 SV=2 - [CISY_HUMAN]                                 | 155.471469 | 19.74 | 9  | 9  |
| 123          | P23526 | Adenosylhomocysteinase OS=Homo sapiens<br>GN=AHCY PE=1 SV=4 - [SAHH_HUMAN]                                        | 155.349848 | 24.77 | 10 | 10 |
| 124          | P10316 | HLA class I histocompatibility antigen, A-69<br>alpha chain OS=Homo sapiens GN=HLA-A<br>PE=1 SV=2 - [1A69_HUMAN]  | 155.21171  | 26.85 | 0  | 7  |
| 125          | Q6NUK1 | Calcium-binding mitochondrial carrier protein<br>SCaMC-1 OS=Homo sapiens GN=SLC25A24<br>PE=1 SV=2 - [SCMC1_HUMAN] | 154.691375 | 37.11 | 16 | 16 |
| 126          | Q7Z3B4 | Nucleoporin p54 OS=Homo sapiens<br>GN=NUP54 PE=1 SV=2 - [NUP54_HUMAN]                                             | 154.507225 | 16.77 | 7  | 7  |

|     |        |                                                                                                                                                                               |            |       |    |    |
|-----|--------|-------------------------------------------------------------------------------------------------------------------------------------------------------------------------------|------------|-------|----|----|
| 127 | Q9UJU6 | Drebrin-like protein OS=Homo sapiens<br>GN=DBNL PE=1 SV=1 - [DBNL_HUMAN]                                                                                                      | 153.77808  | 23.95 | 8  | 8  |
| 128 | P07900 | Heat shock protein HSP 90-alpha OS=Homo<br>sapiens GN=HSP90AA1 PE=1 SV=5 -<br>[HS90A_HUMAN]                                                                                   | 153.761542 | 10.25 | 1  | 7  |
| 129 | O00505 | Importin subunit alpha-4 OS=Homo sapiens<br>GN=KPNA3 PE=1 SV=2 - [IMA4_HUMAN]                                                                                                 | 152.731424 | 13.24 | 3  | 7  |
| 130 | O00303 | Eukaryotic translation initiation factor 3<br>subunit F OS=Homo sapiens GN=EIF3F<br>PE=1 SV=1 - [EIF3F_HUMAN]                                                                 | 151.828429 | 21.85 | 7  | 7  |
| 131 | O95747 | Serine/threonine-protein kinase OSR1<br>OS=Homo sapiens GN=OXSR1 PE=1 SV=1 -<br>[OXSR1_HUMAN]                                                                                 | 148.9819   | 15.75 | 7  | 7  |
| 132 | Q9Y285 | Phenylalanine--tRNA ligase alpha subunit<br>OS=Homo sapiens GN=FARSA PE=1 SV=3 -<br>[SYFA_HUMAN]                                                                              | 148.634763 | 24.02 | 11 | 11 |
| 133 | P36957 | Dihydrolipoylysine-residue<br>succinyltransferase component of 2-<br>oxoglutarate dehydrogenase complex,<br>mitochondrial OS=Homo sapiens GN=DLST<br>PE=1 SV=4 - [ODO2_HUMAN] | 147.054078 | 13.47 | 6  | 6  |
| 134 | Q13148 | TAR DNA-binding protein 43 OS=Homo<br>sapiens GN=TARDBP PE=1 SV=1 -<br>[TADBP_HUMAN]                                                                                          | 143.529432 | 11.35 | 4  | 4  |
| 135 | P48723 | Heat shock 70 kDa protein 13 OS=Homo<br>sapiens GN=HSPA13 PE=1 SV=1 -<br>[HSP13_HUMAN]                                                                                        | 141.459109 | 17.62 | 7  | 8  |
| 136 | Q9Y6G9 | Cytoplasmic dynein 1 light intermediate<br>chain 1 OS=Homo sapiens GN=DYNC1LI1<br>PE=1 SV=3 - [DC1L1_HUMAN]                                                                   | 140.616032 | 28.3  | 13 | 13 |
| 137 | P61163 | Alpha-centractin OS=Homo sapiens<br>GN=ACTR1A PE=1 SV=1 - [ACTZ_HUMAN]                                                                                                        | 140.516588 | 31.12 | 7  | 7  |
| 138 | P17844 | Probable ATP-dependent RNA helicase DDX5<br>OS=Homo sapiens GN=DDX5 PE=1 SV=1 -<br>[DDX5_HUMAN]                                                                               | 140.468633 | 14.33 | 9  | 9  |
| 139 | O94905 | Erlin-2 OS=Homo sapiens GN=ERLIN2 PE=1<br>SV=1 - [ERLN2_HUMAN]                                                                                                                | 139.283975 | 15.34 | 4  | 4  |
| 140 | Q7L1Q6 | Basic leucine zipper and W2 domain-<br>containing protein 1 OS=Homo sapiens<br>GN=BZW1 PE=1 SV=1 - [BZW1_HUMAN]                                                               | 138.118687 | 21.48 | 8  | 11 |
| 141 | O75351 | Vacuolar protein sorting-associated protein<br>4B OS=Homo sapiens GN=VPS4B PE=1<br>SV=2 - [VPS4B_HUMAN]                                                                       | 138.077925 | 20.5  | 4  | 8  |
| 142 | P25705 | ATP synthase subunit alpha, mitochondrial                                                                                                                                     | 137.928369 | 10.49 | 6  | 6  |

|     |        |                                                                    |            |       |   |    |
|-----|--------|--------------------------------------------------------------------|------------|-------|---|----|
|     |        | OS=Homo sapiens GN=ATP5A1 PE=1 SV=1<br>- [ATPA_HUMAN]              |            |       |   |    |
|     |        | 78 kDa glucose-regulated protein OS=Homo                           |            |       |   |    |
| 143 | P11021 | sapiens GN=HSPA5 PE=1 SV=2 -<br>[GRP78_HUMAN]                      | 133.02428  | 16.51 | 8 | 10 |
|     |        | Serine palmitoyltransferase 2 OS=Homo                              |            |       |   |    |
| 144 | O15270 | sapiens GN=SPTLC2 PE=1 SV=1 -<br>[SPTC2_HUMAN]                     | 131.881227 | 11.39 | 6 | 6  |
|     |        | Fatty acid-binding protein, heart OS=Homo                          |            |       |   |    |
| 145 | P05413 | sapiens GN=FABP3 PE=1 SV=4 -<br>[FABPH_HUMAN]                      | 131.507836 | 27.07 | 4 | 4  |
|     |        | DnaJ homolog subfamily A member 1                                  |            |       |   |    |
| 146 | P31689 | OS=Homo sapiens GN=DNAJA1 PE=1 SV=2<br>- [DNJA1_HUMAN]             | 131.072083 | 17.13 | 6 | 6  |
|     |        | Protein phosphatase 1F OS=Homo sapiens                             |            |       |   |    |
| 147 | P49593 | GN=PPM1F PE=1 SV=3 - [PPM1F_HUMAN]                                 | 130.675288 | 16.96 | 7 | 7  |
|     |        | 28S ribosomal protein S27, mitochondrial                           |            |       |   |    |
| 148 | Q92552 | OS=Homo sapiens GN=MRPS27 PE=1 SV=3<br>- [RT27_HUMAN]              | 130.083083 | 14.73 | 6 | 6  |
|     |        | Rap1 GTPase-GDP dissociation stimulator 1                          |            |       |   |    |
| 149 | P52306 | OS=Homo sapiens GN=RAP1GDS1 PE=1<br>SV=3 - [GDS1_HUMAN]            | 127.88566  | 9.23  | 5 | 5  |
|     |        | Keratin, type I cytoskeletal 13 OS=Homo                            |            |       |   |    |
| 150 | P13646 | sapiens GN=KRT13 PE=1 SV=4 -<br>[K1C13_HUMAN]                      | 126.367949 | 10.7  | 1 | 5  |
|     |        | 3-ketoacyl-CoA thiolase, mitochondrial                             |            |       |   |    |
| 151 | P42765 | OS=Homo sapiens GN=ACAA2 PE=1 SV=2 -<br>[THIM_HUMAN]               | 125.949923 | 24.94 | 6 | 6  |
|     |        | Probable cysteine--tRNA ligase,                                    |            |       |   |    |
| 152 | Q9HA77 | mitochondrial OS=Homo sapiens GN=CARS2<br>PE=1 SV=1 - [SYCM_HUMAN] | 124.802376 | 13.3  | 6 | 6  |
|     |        | Intercellular adhesion molecule 2 OS=Homo                          |            |       |   |    |
| 153 | P13598 | sapiens GN=ICAM2 PE=1 SV=2 -<br>[ICAM2_HUMAN]                      | 124.707682 | 14.18 | 4 | 4  |
|     |        | Protein phosphatase 1 regulatory subunit 7                         |            |       |   |    |
| 154 | Q15435 | OS=Homo sapiens GN=PPP1R7 PE=1 SV=1 -<br>[PP1R7_HUMAN]             | 123.853869 | 17.78 | 5 | 5  |
|     |        | Multifunctional protein ADE2 OS=Homo                               |            |       |   |    |
| 155 | P22234 | sapiens GN=PAICS PE=1 SV=3 -<br>[PUR6_HUMAN]                       | 123.570962 | 20    | 8 | 8  |
|     |        | Septin-2 OS=Homo sapiens GN=SEPT2 PE=1                             |            |       |   |    |
| 156 | Q15019 | SV=1 - [SEPT2_HUMAN]                                               | 121.66388  | 27.98 | 7 | 7  |
|     |        | Protein FAM98A OS=Homo sapiens                                     |            |       |   |    |
| 157 | Q8NCA5 | GN=FAM98A PE=1 SV=1 - [FA98A_HUMAN]                                | 119.231711 | 9.83  | 3 | 3  |

|     |        |                                                                                                                             |            |       |    |    |
|-----|--------|-----------------------------------------------------------------------------------------------------------------------------|------------|-------|----|----|
| 158 | Q9BQE3 | Tubulin alpha-1C chain OS=Homo sapiens<br>GN=TUBA1C PE=1 SV=1 - [TBA1C_HUMAN]                                               | 117.911429 | 19.82 | 6  | 6  |
| 159 | P21333 | Filamin-A OS=Homo sapiens GN=FLNA PE=1<br>SV=4 - [FLNA_HUMAN]                                                               | 117.779032 | 4.04  | 7  | 8  |
| 160 | Q9UNQ0 | ATP-binding cassette sub-family G member 2<br>OS=Homo sapiens GN=ABCG2 PE=1 SV=3 -<br>[ABCG2_HUMAN]                         | 116.30853  | 6.26  | 4  | 4  |
| 161 | P37268 | Squalene synthase OS=Homo sapiens<br>GN=FDFT1 PE=1 SV=1 - [FDFT_HUMAN]                                                      | 116.110374 | 13.43 | 5  | 5  |
| 162 | Q9UHG3 | Prenylcysteine oxidase 1 OS=Homo sapiens<br>GN=PCYOX1 PE=1 SV=3 - [PCYOX_HUMAN]                                             | 116.007175 | 20    | 8  | 8  |
| 163 | P55809 | Succinyl-CoA:3-ketoacid coenzyme A<br>transferase 1, mitochondrial OS=Homo<br>sapiens GN=OXCT1 PE=1 SV=1 -<br>[SCOT1_HUMAN] | 115.683084 | 29.04 | 11 | 11 |
| 164 | Q13177 | Serine/threonine-protein kinase PAK 2<br>OS=Homo sapiens GN=PAK2 PE=1 SV=3 -<br>[PAK2_HUMAN]                                | 114.120252 | 22.33 | 10 | 10 |
| 165 | P69905 | Hemoglobin subunit alpha OS=Homo sapiens<br>GN=HBA1 PE=1 SV=2 - [HBA_HUMAN]                                                 | 114.101598 | 47.89 | 7  | 7  |
| 166 | P07355 | Annexin A2 OS=Homo sapiens GN=ANXA2<br>PE=1 SV=2 - [ANXA2_HUMAN]                                                            | 113.645192 | 12.98 | 4  | 4  |
| 167 | P39023 | 60S ribosomal protein L3 OS=Homo sapiens<br>GN=RPL3 PE=1 SV=2 - [RL3_HUMAN]                                                 | 112.66791  | 19.11 | 7  | 7  |
| 168 | P11172 | Uridine 5'-monophosphate synthase<br>OS=Homo sapiens GN=UMPS PE=1 SV=1 -<br>[UMPS_HUMAN]                                    | 112.174592 | 20.83 | 9  | 9  |
| 169 | P50995 | Annexin A11 OS=Homo sapiens GN=ANXA11<br>PE=1 SV=1 - [ANX11_HUMAN]                                                          | 112.12578  | 17.03 | 8  | 8  |
| 170 | P11940 | Polyadenylate-binding protein 1 OS=Homo<br>sapiens GN=PABPC1 PE=1 SV=2 -<br>[PABP1_HUMAN]                                   | 111.779449 | 11.79 | 7  | 7  |
| 171 | P05783 | Keratin, type I cytoskeletal 18 OS=Homo<br>sapiens GN=KRT18 PE=1 SV=2 -<br>[K1C18_HUMAN]                                    | 111.421166 | 19.53 | 8  | 9  |
| 172 | P06733 | Alpha-enolase OS=Homo sapiens GN=ENO1<br>PE=1 SV=2 - [ENOA_HUMAN]                                                           | 111.035985 | 14.75 | 5  | 5  |
| 173 | Q8N684 | Cleavage and polyadenylation specificity<br>factor subunit 7 OS=Homo sapiens<br>GN=CPSF7 PE=1 SV=1 - [CPSF7_HUMAN]          | 109.718492 | 12.95 | 6  | 6  |
| 174 | P31025 | Lipocalin-1 OS=Homo sapiens GN=LCN1<br>PE=1 SV=1 - [LCN1_HUMAN]                                                             | 109.606385 | 32.95 | 4  | 4  |
| 175 | O75306 | NADH dehydrogenase [ubiquinone] iron-<br>sulfur protein 2, mitochondrial OS=Homo                                            | 107.961402 | 18.79 | 7  | 7  |

|     |        |                                                                                                              |            |       |    |    |
|-----|--------|--------------------------------------------------------------------------------------------------------------|------------|-------|----|----|
|     |        | sapiens GN=NDUFS2 PE=1 SV=2 -<br>[NDUS2_HUMAN]<br>DDR GK domain-containing protein 1                         |            |       |    |    |
| 176 | Q96HY6 | OS=Homo sapiens GN=DDR GK1 PE=1 SV=2<br>- [DDR GK_HUMAN]<br>ATP synthase subunit beta, mitochondrial         | 106.857718 | 14.01 | 3  | 3  |
| 177 | P06576 | OS=Homo sapiens GN=ATP5B PE=1 SV=3 -<br>[ATPB_HUMAN]<br>U3 small nucleolar RNA-associated protein            | 105.431118 | 12.85 | 5  | 5  |
| 178 | Q8TED0 | 15 homolog OS=Homo sapiens GN=UTP15<br>PE=1 SV=3 - [UTP15_HUMAN]<br>COP9 signalosome complex subunit 1       | 105.049209 | 22.2  | 11 | 11 |
| 179 | Q13098 | OS=Homo sapiens GN=GPS1 PE=1 SV=4 -<br>[CSN1_HUMAN]<br>Stress-70 protein, mitochondrial OS=Homo              | 104.797365 | 10.79 | 5  | 5  |
| 180 | P38646 | sapiens GN=HSPA9 PE=1 SV=2 -<br>[GRP75_HUMAN]<br>Matrix metalloproteinase-14 OS=Homo                         | 103.885489 | 11.34 | 6  | 7  |
| 181 | P50281 | sapiens GN=MMP14 PE=1 SV=3 -<br>[MMP14_HUMAN]<br>Tripeptidyl-peptidase 1 OS=Homo sapiens                     | 103.872088 | 12.37 | 7  | 7  |
| 182 | O14773 | GN=TPP1 PE=1 SV=2 - [TPP1_HUMAN]<br>Cytosol aminopeptidase OS=Homo sapiens                                   | 102.181062 | 8.17  | 3  | 3  |
| 183 | P28838 | GN=LAP3 PE=1 SV=3 - [AMPL_HUMAN]<br>Tubulin alpha chain-like 3 OS=Homo sapiens                               | 101.94917  | 9.83  | 4  | 4  |
| 184 | A6NHL2 | GN=TUBAL3 PE=1 SV=2 - [TBAL3_HUMAN]<br>NSFL1 cofactor p47 OS=Homo sapiens                                    | 101.930564 | 8.3   | 1  | 4  |
| 185 | Q9UNZ2 | GN=NSFL1C PE=1 SV=2 - [NSF1C_HUMAN]<br>Serine/threonine-protein kinase 24                                    | 99.7877864 | 16.49 | 4  | 4  |
| 186 | Q9Y6E0 | OS=Homo sapiens GN=STK24 PE=1 SV=1 -<br>[STK24_HUMAN]<br>DnaJ homolog subfamily A member 2                   | 99.618644  | 17.83 | 7  | 7  |
| 187 | O60884 | OS=Homo sapiens GN=DNAJA2 PE=1 SV=1<br>- [DNJA2_HUMAN]<br>Splicing factor, proline- and glutamine-rich       | 98.7558415 | 21.84 | 6  | 6  |
| 188 | P23246 | OS=Homo sapiens GN=SFPQ PE=1 SV=2 -<br>[SFPQ_HUMAN]<br>26S proteasome non-ATPase regulatory                  | 98.3325663 | 6.93  | 4  | 5  |
| 189 | Q15008 | subunit 6 OS=Homo sapiens GN=PSMD6<br>PE=1 SV=1 - [PSMD6_HUMAN]<br>Aspartate aminotransferase, mitochondrial | 97.8707052 | 26.48 | 10 | 10 |
| 190 | P00505 | OS=Homo sapiens GN=GOT2 PE=1 SV=3 -<br>[AATM_HUMAN]<br>Importin subunit alpha-3 OS=Homo sapiens              | 97.770083  | 8.37  | 3  | 3  |
| 191 | O00629 |                                                                                                              | 96.3470109 | 15.36 | 2  | 6  |

|     |        |                                                                     |            |       |   |   |
|-----|--------|---------------------------------------------------------------------|------------|-------|---|---|
|     |        | GN=KPNA4 PE=1 SV=1 - [IMA3_HUMAN]                                   |            |       |   |   |
|     |        | Microtubule-associated protein 4 OS=Homo                            |            |       |   |   |
| 192 | P27816 | sapiens GN=MAP4 PE=1 SV=3 -<br>[MAP4_HUMAN]                         | 96.2230032 | 5.21  | 5 | 5 |
|     |        | Keratin, type II cytoskeletal 72 OS=Homo                            |            |       |   |   |
| 193 | Q14CN4 | sapiens GN=KRT72 PE=1 SV=2 -<br>[K2C72_HUMAN]                       | 96.1931478 | 7.05  | 1 | 5 |
|     |        | Basic leucine zipper and W2 domain-                                 |            |       |   |   |
| 194 | Q9Y6E2 | containing protein 2 OS=Homo sapiens                                | 96.1038279 | 16.47 | 5 | 8 |
|     |        | GN=BZW2 PE=1 SV=1 - [BZW2_HUMAN]                                    |            |       |   |   |
|     |        | U4/U6 small nuclear ribonucleoprotein Prp31                         |            |       |   |   |
| 195 | Q8WWY3 | OS=Homo sapiens GN=PRPF31 PE=1 SV=2 -<br>[PRP31_HUMAN]              | 95.8846845 | 16.03 | 6 | 6 |
|     |        | Acyl-coenzyme A thioesterase 9,                                     |            |       |   |   |
| 196 | Q9Y305 | mitochondrial OS=Homo sapiens GN=ACOT9<br>PE=1 SV=2 - [ACOT9_HUMAN] | 95.4615764 | 12.53 | 5 | 5 |
|     |        | Lysophosphatidylcholine acyltransferase 1                           |            |       |   |   |
| 197 | Q8NF37 | OS=Homo sapiens GN=LPCAT1 PE=1 SV=2<br>- [PCAT1_HUMAN]              | 94.8371072 | 8.24  | 4 | 4 |
|     |        | Ornithine aminotransferase, mitochondrial                           |            |       |   |   |
| 198 | P04181 | OS=Homo sapiens GN=OAT PE=1 SV=1 -<br>[OAT_HUMAN]                   | 93.6896366 | 16.63 | 6 | 6 |
|     |        | Pre-mRNA-splicing regulator WTAP                                    |            |       |   |   |
| 199 | Q15007 | OS=Homo sapiens GN=WTAP PE=1 SV=2 -<br>[FL2D_HUMAN]                 | 92.1362927 | 7.83  | 3 | 3 |
|     |        | Serine palmitoyltransferase 1 OS=Homo                               |            |       |   |   |
| 200 | O15269 | sapiens GN=SPTLC1 PE=1 SV=1 -<br>[SPTC1_HUMAN]                      | 91.7885457 | 18.18 | 7 | 7 |
|     |        | Programmed cell death protein 4 OS=Homo                             |            |       |   |   |
| 201 | Q53EL6 | sapiens GN=PDCD4 PE=1 SV=2 -<br>[PDCD4_HUMAN]                       | 91.2867081 | 9.59  | 5 | 5 |
|     |        | Histone H2A type 1-H OS=Homo sapiens                                |            |       |   |   |
| 202 | Q96KK5 | GN=HIST1H2AH PE=1 SV=3 -<br>[H2A1H_HUMAN]                           | 89.4809313 | 27.34 | 3 | 3 |
|     |        | 39S ribosomal protein L37, mitochondrial                            |            |       |   |   |
| 203 | Q9BZE1 | OS=Homo sapiens GN=MRPL37 PE=1 SV=2<br>- [RM37_HUMAN]               | 89.3883046 | 17.49 | 6 | 6 |
|     |        | Ig kappa chain V-II region TEW OS=Homo                              |            |       |   |   |
| 204 | P01617 | sapiens PE=1 SV=1 - [KV204_HUMAN]                                   | 88.3063411 | 6.19  | 1 | 1 |
|     |        | Serine/arginine-rich splicing factor 6                              |            |       |   |   |
| 205 | Q13247 | OS=Homo sapiens GN=SRSF6 PE=1 SV=2 -<br>[SRSF6_HUMAN]               | 88.2345321 | 9.3   | 4 | 4 |
|     |        | Tubulin beta chain OS=Homo sapiens                                  |            |       |   |   |
| 206 | P07437 | GN=TUBB PE=1 SV=2 - [TBB5_HUMAN]                                    | 87.913692  | 22.75 | 3 | 9 |

|     |        |                                                                                                                         |            |       |    |    |
|-----|--------|-------------------------------------------------------------------------------------------------------------------------|------------|-------|----|----|
|     |        | HLA class I histocompatibility antigen, Cw-17                                                                           |            |       |    |    |
| 207 | Q95604 | alpha chain OS=Homo sapiens GN=HLA-C<br>PE=1 SV=1 - [1C17_HUMAN]                                                        | 87.8781866 | 16.13 | 1  | 4  |
| 208 | Q9Y490 | Talin-1 OS=Homo sapiens GN=TLN1 PE=1<br>SV=3 - [TLN1_HUMAN]                                                             | 87.38553   | 6.1   | 12 | 12 |
| 209 | Q9P2R7 | Succinyl-CoA ligase [ADP-forming] subunit<br>beta, mitochondrial OS=Homo sapiens<br>GN=SUCLA2 PE=1 SV=3 - [SUCB1_HUMAN] | 87.3510121 | 11.45 | 5  | 5  |
| 210 | P16989 | Y-box-binding protein 3 OS=Homo sapiens<br>GN=YBX3 PE=1 SV=4 - [YBOX3_HUMAN]                                            | 86.738053  | 20.43 | 5  | 5  |
| 211 | P31948 | Stress-induced-phosphoprotein 1 OS=Homo<br>sapiens GN=STIP1 PE=1 SV=1 -<br>[STIP1_HUMAN]                                | 86.6696164 | 6.81  | 4  | 4  |
| 212 | P01024 | Complement C3 OS=Homo sapiens GN=C3<br>PE=1 SV=2 - [CO3_HUMAN]                                                          | 86.5854382 | 2.53  | 4  | 4  |
| 213 | Q6KB66 | Keratin, type II cytoskeletal 80 OS=Homo<br>sapiens GN=KRT80 PE=1 SV=2 -<br>[K2C80_HUMAN]                               | 85.9423598 | 11.95 | 5  | 5  |
| 214 | Q13451 | Peptidyl-prolyl cis-trans isomerase FKBP5<br>OS=Homo sapiens GN=FKBP5 PE=1 SV=2 -<br>[FKBP5_HUMAN]                      | 85.5856568 | 22.76 | 9  | 9  |
| 215 | Q9Y570 | Protein phosphatase methylesterase 1<br>OS=Homo sapiens GN=PPME1 PE=1 SV=3 -<br>[PPME1_HUMAN]                           | 84.8436795 | 5.18  | 2  | 2  |
| 216 | P52209 | 6-phosphogluconate dehydrogenase,<br>decarboxylating OS=Homo sapiens GN=PGD<br>PE=1 SV=3 - [6PGD_HUMAN]                 | 84.8034571 | 16.15 | 6  | 6  |
| 217 | Q9P258 | Protein RCC2 OS=Homo sapiens GN=RCC2<br>PE=1 SV=2 - [RCC2_HUMAN]                                                        | 84.5389292 | 11.69 | 7  | 7  |
| 218 | Q8IV48 | 3'-5' exoribonuclease 1 OS=Homo sapiens<br>GN=ERI1 PE=1 SV=3 - [ERI1_HUMAN]                                             | 83.5556393 | 6.3   | 2  | 2  |
| 219 | Q9UJW0 | Dynactin subunit 4 OS=Homo sapiens<br>GN=DCTN4 PE=1 SV=1 - [DCTN4_HUMAN]                                                | 83.3189525 | 10.22 | 5  | 5  |
| 220 | P43490 | Nicotinamide phosphoribosyltransferase<br>OS=Homo sapiens GN=NAMPT PE=1 SV=1 -<br>[NAMPT_HUMAN]                         | 83.3026382 | 20.57 | 8  | 8  |
| 221 | Q96FN4 | Copine-2 OS=Homo sapiens GN=CPNE2<br>PE=1 SV=3 - [CPNE2_HUMAN]                                                          | 83.0760097 | 8.21  | 3  | 4  |
| 222 | P55010 | Eukaryotic translation initiation factor 5<br>OS=Homo sapiens GN=EIF5 PE=1 SV=2 -<br>[IF5_HUMAN]                        | 82.8945088 | 18.56 | 8  | 8  |
| 223 | O95219 | Sorting nexin-4 OS=Homo sapiens GN=SNX4<br>PE=1 SV=1 - [SNX4_HUMAN]                                                     | 81.6043784 | 12.44 | 5  | 5  |
| 224 | P53990 | IST1 homolog OS=Homo sapiens GN=IST1                                                                                    | 81.2474326 | 17.31 | 5  | 5  |

|     |        |                                                                                                           |            |       |   |   |
|-----|--------|-----------------------------------------------------------------------------------------------------------|------------|-------|---|---|
|     |        | PE=1 SV=1 - [IST1_HUMAN]                                                                                  |            |       |   |   |
| 225 | Q15293 | Reticulocalbin-1 OS=Homo sapiens<br>GN=RCN1 PE=1 SV=1 - [RCN1_HUMAN]                                      | 80.6233454 | 15.41 | 6 | 6 |
| 226 | Q9UN37 | Vacuolar protein sorting-associated protein<br>4A OS=Homo sapiens GN=VPS4A PE=1<br>SV=1 - [VPS4A_HUMAN]   | 80.4870063 | 14.19 | 2 | 6 |
| 227 | P21980 | Protein-glutamine gamma-<br>glutamyltransferase 2 OS=Homo sapiens<br>GN=TGM2 PE=1 SV=2 - [TGM2_HUMAN]     | 80.3957319 | 10.77 | 7 | 7 |
| 228 | P55084 | Trifunctional enzyme subunit beta,<br>mitochondrial OS=Homo sapiens<br>GN=HADHB PE=1 SV=3 - [ECHB_HUMAN]  | 80.384384  | 17.09 | 8 | 8 |
| 229 | O75369 | Filamin-B OS=Homo sapiens GN=FLNB PE=1<br>SV=2 - [FLNB_HUMAN]                                             | 79.3326997 | 2.38  | 4 | 5 |
| 230 | O60701 | UDP-glucose 6-dehydrogenase OS=Homo<br>sapiens GN=UGDH PE=1 SV=1 -<br>[UGDH_HUMAN]                        | 79.117083  | 18.83 | 6 | 6 |
| 231 | Q9NRG9 | Aladin OS=Homo sapiens GN=AAAS PE=1<br>SV=1 - [AAAS_HUMAN]                                                | 78.3895054 | 4.03  | 2 | 2 |
| 232 | Q8NBX0 | Saccharopine dehydrogenase-like<br>oxidoreductase OS=Homo sapiens<br>GN=SCCPDH PE=1 SV=1 - [SCPDL_HUMAN]  | 78.0340678 | 11.19 | 4 | 4 |
| 233 | Q9H8Y8 | Golgi reassembly-stacking protein 2<br>OS=Homo sapiens GN=GORASP2 PE=1<br>SV=3 - [GORS2_HUMAN]            | 77.9788843 | 14.16 | 4 | 4 |
| 234 | Q8NEF9 | Serum response factor-binding protein 1<br>OS=Homo sapiens GN=SRFBP1 PE=1 SV=1<br>- [SRFB1_HUMAN]         | 77.539624  | 9.79  | 4 | 4 |
| 235 | Q9BS26 | Endoplasmic reticulum resident protein 44<br>OS=Homo sapiens GN=ERP44 PE=1 SV=1 -<br>[ERP44_HUMAN]        | 77.4666711 | 13.55 | 6 | 6 |
| 236 | P31150 | Rab GDP dissociation inhibitor alpha<br>OS=Homo sapiens GN=GDI1 PE=1 SV=2 -<br>[GDIA_HUMAN]               | 77.2333333 | 17.45 | 6 | 6 |
| 237 | Q96IJ6 | Mannose-1-phosphate guanyltransferase<br>alpha OS=Homo sapiens GN=GMPPA PE=1<br>SV=1 - [GMPPA_HUMAN]      | 76.977956  | 10.24 | 4 | 4 |
| 238 | O14929 | Histone acetyltransferase type B catalytic<br>subunit OS=Homo sapiens GN=HAT1 PE=1<br>SV=1 - [HAT1_HUMAN] | 76.9399653 | 7.4   | 2 | 2 |
| 239 | O75718 | Cartilage-associated protein OS=Homo<br>sapiens GN=CRTAP PE=1 SV=1 -<br>[CRTAP_HUMAN]                     | 75.5622688 | 11.72 | 5 | 5 |
| 240 | O94788 | Retinal dehydrogenase 2 OS=Homo sapiens                                                                   | 75.23      | 2.7   | 1 | 1 |



|     |        |                                                                                                           |            |       |   |   |  |
|-----|--------|-----------------------------------------------------------------------------------------------------------|------------|-------|---|---|--|
|     |        | GN=ALDH1A2 PE=1 SV=3 -<br>[AL1A2_HUMAN]<br>2',3'-cyclic-nucleotide 3'-phosphodiesterase                   |            |       |   |   |  |
| 241 | P09543 | OS=Homo sapiens GN=CNP PE=1 SV=2 -<br>[CN37_HUMAN]                                                        | 74.9369312 | 20.19 | 7 | 7 |  |
| 242 | Q9BXY0 | Protein MAK16 homolog OS=Homo sapiens<br>GN=MAK16 PE=1 SV=2 - [MAK16_HUMAN]                               | 74.5774789 | 9     | 2 | 2 |  |
| 243 | P20839 | Inosine-5'-monophosphate dehydrogenase 1<br>OS=Homo sapiens GN=IMPDH1 PE=1 SV=2<br>- [IMDH1_HUMAN]        | 74.5680416 | 6.42  | 2 | 3 |  |
| 244 | Q14554 | Protein disulfide-isomerase A5 OS=Homo<br>sapiens GN=PDIA5 PE=1 SV=1 -<br>[PDIA5_HUMAN]                   | 74.55197   | 11.18 | 6 | 6 |  |
| 245 | Q08188 | Protein-glutamine gamma-<br>glutamyltransferase E OS=Homo sapiens<br>GN=TGM3 PE=1 SV=4 - [TGM3_HUMAN]     | 74.5016314 | 6.35  | 3 | 3 |  |
| 246 | Q99961 | Endophilin-A2 OS=Homo sapiens<br>GN=SH3GL1 PE=1 SV=1 - [SH3G1_HUMAN]                                      | 74.428376  | 11.14 | 4 | 4 |  |
| 247 | Q9P287 | BRCA2 and CDKN1A-interacting protein<br>OS=Homo sapiens GN=BCCIP PE=1 SV=1 -<br>[BCCIP_HUMAN]             | 73.6854485 | 13.69 | 3 | 3 |  |
| 248 | P25311 | Zinc-alpha-2-glycoprotein OS=Homo sapiens<br>GN=AZGP1 PE=1 SV=2 - [ZA2G_HUMAN]                            | 73.06      | 8.39  | 2 | 2 |  |
| 249 | P81605 | Dermcidin OS=Homo sapiens GN=DCD PE=1<br>SV=2 - [DCD_HUMAN]                                               | 73.0470222 | 22.73 | 2 | 2 |  |
| 250 | O43159 | Ribosomal RNA-processing protein 8<br>OS=Homo sapiens GN=RRP8 PE=1 SV=2 -<br>[RRP8_HUMAN]                 | 72.8645511 | 9.65  | 3 | 3 |  |
| 251 | P12955 | Xaa-Pro dipeptidase OS=Homo sapiens<br>GN=PEPD PE=1 SV=3 - [PEPD_HUMAN]                                   | 72.4776892 | 6.09  | 3 | 3 |  |
| 252 | Q16222 | UDP-N-acetylhexosamine pyrophosphorylase<br>OS=Homo sapiens GN=UAP1 PE=1 SV=3 -<br>[UAP1_HUMAN]           | 71.9616629 | 8.43  | 4 | 5 |  |
| 253 | P13797 | Plastin-3 OS=Homo sapiens GN=PLS3 PE=1<br>SV=4 - [PLST_HUMAN]                                             | 71.7729461 | 3.49  | 2 | 2 |  |
| 254 | P15924 | Desmoplakin OS=Homo sapiens GN=DSP<br>PE=1 SV=3 - [DESP_HUMAN]                                            | 71.5265529 | 2.89  | 8 | 8 |  |
| 255 | Q92917 | G patch domain and KOW motifs-containing<br>protein OS=Homo sapiens GN=GPKOW<br>PE=1 SV=2 - [GPKOW_HUMAN] | 71.2477616 | 17.86 | 6 | 6 |  |
| 256 | Q15149 | Plectin OS=Homo sapiens GN=PLEC PE=1<br>SV=3 - [PLEC_HUMAN]                                               | 71.0694518 | 1.47  | 6 | 6 |  |
| 257 | Q9HCC0 | Methylcrotonoyl-CoA carboxylase beta chain,<br>mitochondrial OS=Homo sapiens GN=MCCC2                     | 70.6921836 | 5.51  | 2 | 2 |  |

|     |        |                                              |            |       |   |   |
|-----|--------|----------------------------------------------|------------|-------|---|---|
|     |        | PE=1 SV=1 - [MCCB_HUMAN]                     |            |       |   |   |
|     |        | Asparagine synthetase [glutamine-            |            |       |   |   |
| 258 | P08243 | hydrolyzing] OS=Homo sapiens GN=ASNS         | 69.4552263 | 14.62 | 8 | 8 |
|     |        | PE=1 SV=4 - [ASNS_HUMAN]                     |            |       |   |   |
|     |        | Tubulin beta-2A chain OS=Homo sapiens        |            |       |   |   |
| 259 | Q13885 | GN=TUBB2A PE=1 SV=1 - [TBB2A_HUMAN]          | 69.3359079 | 16.63 | 1 | 7 |
|     |        | Peroxisomal multifunctional enzyme type 2    |            |       |   |   |
| 260 | P51659 | OS=Homo sapiens GN=HSD17B4 PE=1              | 69.3       | 10.87 | 4 | 4 |
|     |        | SV=3 - [DHB4_HUMAN]                          |            |       |   |   |
|     |        | Importin subunit alpha-7 OS=Homo sapiens     |            |       |   |   |
| 261 | O60684 | GN=KPNA6 PE=1 SV=1 - [IMA7_HUMAN]            | 68.9245333 | 7.28  | 3 | 3 |
|     |        | Ras-related protein Rab-18 OS=Homo           |            |       |   |   |
| 262 | Q9NP72 | sapiens GN=RAB18 PE=1 SV=1 -                 | 68.796302  | 14.56 | 3 | 3 |
|     |        | [RAB18_HUMAN]                                |            |       |   |   |
|     |        | KDEL motif-containing protein 1 OS=Homo      |            |       |   |   |
| 263 | Q6UW63 | sapiens GN=KDEL1 PE=1 SV=1 -                 | 68.523912  | 11.75 | 6 | 6 |
|     |        | [KDEL1_HUMAN]                                |            |       |   |   |
|     |        | Perilipin-2 OS=Homo sapiens GN=PLIN2         |            |       |   |   |
| 264 | Q99541 | PE=1 SV=2 - [PLIN2_HUMAN]                    | 68.1602227 | 2.52  | 1 | 1 |
|     |        | Medium-chain specific acyl-CoA               |            |       |   |   |
|     |        | dehydrogenase, mitochondrial OS=Homo         |            |       |   |   |
| 265 | P11310 | sapiens GN=ACADM PE=1 SV=1 -                 | 67.5676794 | 15.91 | 6 | 6 |
|     |        | [ACADM_HUMAN]                                |            |       |   |   |
|     |        | Heat shock 70 kDa protein 1A OS=Homo         |            |       |   |   |
| 266 | P0DMV8 | sapiens GN=HSPA1A PE=1 SV=1 -                | 67.2849721 | 12.95 | 3 | 7 |
|     |        | [HS71A_HUMAN]                                |            |       |   |   |
|     |        | Moesin OS=Homo sapiens GN=MSN PE=1           |            |       |   |   |
| 267 | P26038 | SV=3 - [MOES_HUMAN]                          | 67.0650749 | 4.68  | 3 | 3 |
|     |        | Mitochondrial-processing peptidase subunit   |            |       |   |   |
| 268 | O75439 | beta OS=Homo sapiens GN=PMPCB PE=1           | 66.2541217 | 10.43 | 4 | 4 |
|     |        | SV=2 - [MPPB_HUMAN]                          |            |       |   |   |
|     |        | Tyrosine--tRNA ligase, cytoplasmic           |            |       |   |   |
| 269 | P54577 | OS=Homo sapiens GN=YARS PE=1 SV=4 -          | 66.0216958 | 10.98 | 6 | 6 |
|     |        | [SYYC_HUMAN]                                 |            |       |   |   |
|     |        | WD repeat-containing protein 18 OS=Homo      |            |       |   |   |
| 270 | Q9BV38 | sapiens GN=WDR18 PE=1 SV=2 -                 | 65.9575221 | 8.8   | 4 | 4 |
|     |        | [WDR18_HUMAN]                                |            |       |   |   |
|     |        | Reticulocalbin-2 OS=Homo sapiens             |            |       |   |   |
| 271 | Q14257 | GN=RCN2 PE=1 SV=1 - [RCN2_HUMAN]             | 65.51      | 4.73  | 1 | 1 |
|     |        | Protein                                      |            |       |   |   |
|     |        | farnesyltransferase/geranylgeranyltransferas |            |       |   |   |
| 272 | P49354 | e type-1 subunit alpha OS=Homo sapiens       | 65.35      | 5.28  | 2 | 2 |
|     |        | GN=FNTA PE=1 SV=1 - [FNTA_HUMAN]             |            |       |   |   |
| 273 | P02751 | Fibronectin OS=Homo sapiens GN=FN1           | 65.12      | 0.8   | 1 | 1 |

|     |        |                                                                                                             |            |       |   |   |
|-----|--------|-------------------------------------------------------------------------------------------------------------|------------|-------|---|---|
|     |        | PE=1 SV=4 - [FINC_HUMAN]                                                                                    |            |       |   |   |
| 274 | Q9Y5X2 | Sorting nexin-8 OS=Homo sapiens GN=SNX8<br>PE=1 SV=1 - [SNX8_HUMAN]                                         | 65.09      | 2.8   | 1 | 1 |
| 275 | P0CG48 | Polyubiquitin-C OS=Homo sapiens GN=UBC<br>PE=1 SV=3 - [UBC_HUMAN]                                           | 64.8193098 | 40.73 | 3 | 3 |
| 276 | P49368 | T-complex protein 1 subunit gamma<br>OS=Homo sapiens GN=CCT3 PE=1 SV=4 -<br>[TCPG_HUMAN]                    | 63.4116499 | 3.3   | 2 | 2 |
| 277 | Q13200 | 26S proteasome non-ATPase regulatory<br>subunit 2 OS=Homo sapiens GN=PSMD2<br>PE=1 SV=3 - [PSMD2_HUMAN]     | 63.3848745 | 2.2   | 2 | 2 |
| 278 | Q8N1N4 | Keratin, type II cytoskeletal 78 OS=Homo<br>sapiens GN=KRT78 PE=2 SV=2 -<br>[K2C78_HUMAN]                   | 63.0788391 | 8.08  | 3 | 4 |
| 279 | P31943 | Heterogeneous nuclear ribonucleoprotein H<br>OS=Homo sapiens GN=HNRNPH1 PE=1<br>SV=4 - [HNRH1_HUMAN]        | 62.5471332 | 7.57  | 1 | 2 |
| 280 | P04040 | Catalase OS=Homo sapiens GN=CAT PE=1<br>SV=3 - [CATA_HUMAN]                                                 | 62.3614332 | 4.55  | 2 | 2 |
| 281 | Q13043 | Serine/threonine-protein kinase 4 OS=Homo<br>sapiens GN=STK4 PE=1 SV=2 -<br>[STK4_HUMAN]                    | 62.3022798 | 8.83  | 3 | 3 |
| 282 | P04075 | Fructose-bisphosphate aldolase A OS=Homo<br>sapiens GN=ALDOA PE=1 SV=2 -<br>[ALDOA_HUMAN]                   | 61.72      | 7.14  | 2 | 2 |
| 283 | P14923 | Junction plakoglobin OS=Homo sapiens<br>GN=JUP PE=1 SV=3 - [PLAK_HUMAN]                                     | 61.5922638 | 5.64  | 4 | 4 |
| 284 | P62805 | Histone H4 OS=Homo sapiens<br>GN=HIST1H4A PE=1 SV=2 - [H4_HUMAN]                                            | 61.354322  | 50.49 | 5 | 5 |
| 285 | P06732 | Creatine kinase M-type OS=Homo sapiens<br>GN=CKM PE=1 SV=2 - [KCRM_HUMAN]                                   | 61.2       | 3.67  | 1 | 1 |
| 286 | P38919 | Eukaryotic initiation factor 4A-III OS=Homo<br>sapiens GN=EIF4A3 PE=1 SV=4 -<br>[IF4A3_HUMAN]               | 60.879326  | 7.06  | 1 | 2 |
| 287 | P14625 | Endoplasmic reticulum chaperone protein<br>GN=HSP90B1 PE=1 SV=1 - [ENPL_HUMAN]                              | 60.5549174 | 7.85  | 5 | 6 |
| 288 | Q9NR56 | Muscleblind-like protein 1 OS=Homo sapiens<br>GN=MBNL1 PE=1 SV=2 - [MBNL1_HUMAN]                            | 60.21      | 2.06  | 1 | 1 |
| 289 | P07910 | Heterogeneous nuclear ribonucleoproteins<br>C1/C2 OS=Homo sapiens GN=HNRNPC PE=1<br>SV=4 - [HNRPC_HUMAN]    | 59.6340608 | 12.75 | 3 | 3 |
| 290 | Q8IYW3 | Ankyrin repeat and KH domain-containing<br>protein 1 OS=Homo sapiens GN=ANKHD1<br>PE=1 SV=1 - [ANKH1_HUMAN] | 59.6181604 | 0.28  | 1 | 1 |

|     |        |                                                        |            |       |   |   |  |
|-----|--------|--------------------------------------------------------|------------|-------|---|---|--|
|     |        | Inositol monophosphatase 3 OS=Homo                     |            |       |   |   |  |
| 291 | Q9NX62 | sapiens GN=IMPAD1 PE=1 SV=1 -<br>[IMPA3_HUMAN]         | 59.393705  | 15.32 | 4 | 4 |  |
|     |        | 60 kDa SS-A/Ro ribonucleoprotein OS=Homo               |            |       |   |   |  |
| 292 | P10155 | sapiens GN=TROVE2 PE=1 SV=2 -<br>[RO60_HUMAN]          | 59.1753485 | 4.65  | 3 | 3 |  |
|     |        | Thioredoxin-related transmembrane protein              |            |       |   |   |  |
| 293 | Q9H1E5 | 4 OS=Homo sapiens GN=TMX4 PE=1 SV=1 -<br>[TMX4_HUMAN]  | 58.7824854 | 9.74  | 3 | 3 |  |
|     |        | Leukocyte elastase inhibitor OS=Homo                   |            |       |   |   |  |
| 294 | P30740 | sapiens GN=SERPINB1 PE=1 SV=1 -<br>[ILEU_HUMAN]        | 58.7164217 | 13.19 | 4 | 4 |  |
|     |        | Synaptonemal complex protein SC65                      |            |       |   |   |  |
| 295 | Q92791 | OS=Homo sapiens GN=LEPREL4 PE=1 SV=1<br>- [SC65_HUMAN] | 58.4482986 | 10.3  | 4 | 4 |  |
|     |        | Reticulon-4 OS=Homo sapiens GN=RTN4                    |            |       |   |   |  |
| 296 | Q9NQC3 | PE=1 SV=2 - [RTN4_HUMAN]                               | 58.13      | 1.09  | 1 | 1 |  |
|     |        | HHIP-like protein 2 OS=Homo sapiens                    |            |       |   |   |  |
| 297 | Q6UWX4 | GN=HHIPL2 PE=1 SV=1 - [HHIPL2_HUMAN]                   | 57.2750599 | 3.59  | 3 | 3 |  |
|     |        | Dolichyl-diphosphooligosaccharide--protein             |            |       |   |   |  |
|     |        | glycosyltransferase subunit 1 OS=Homo                  |            |       |   |   |  |
| 298 | P04843 | sapiens GN=RPN1 PE=1 SV=1 -<br>[RPN1_HUMAN]            | 57.0304669 | 5.77  | 3 | 3 |  |
|     |        | cAMP-dependent protein kinase type I-alpha             |            |       |   |   |  |
|     |        | regulatory subunit OS=Homo sapiens                     |            |       |   |   |  |
| 299 | P10644 | GN=PRKAR1A PE=1 SV=1 - [KAP0_HUMAN]                    | 56.85      | 6.3   | 2 | 2 |  |
|     |        | Serine/threonine-protein phosphatase 2B                |            |       |   |   |  |
|     |        | catalytic subunit alpha isoform OS=Homo                |            |       |   |   |  |
| 300 | Q08209 | sapiens GN=PPP3CA PE=1 SV=1 -<br>[PP2BA_HUMAN]         | 56.7781898 | 5.18  | 2 | 3 |  |
|     |        | Peptidyl-prolyl cis-trans isomerase FKBP8              |            |       |   |   |  |
| 301 | Q14318 | OS=Homo sapiens GN=FKBP8 PE=1 SV=2 -<br>[FKBP8_HUMAN]  | 56.2130857 | 9.47  | 3 | 3 |  |
|     |        | Endothelial lipase OS=Homo sapiens                     |            |       |   |   |  |
| 302 | Q9Y5X9 | GN=LIPG PE=1 SV=1 - [LIPE_HUMAN]                       | 56.1778644 | 3.4   | 1 | 1 |  |
|     |        | Cytochrome P450 20A1 OS=Homo sapiens                   |            |       |   |   |  |
| 303 | Q6UW02 | GN=CYP20A1 PE=1 SV=1 - [CP20A_HUMAN]                   | 56.16      | 4.76  | 2 | 2 |  |
|     |        | Calumenin OS=Homo sapiens GN=CALU                      |            |       |   |   |  |
| 304 | O43852 | PE=1 SV=2 - [CALU_HUMAN]                               | 56.1280105 | 21.59 | 5 | 5 |  |
|     |        | COP9 signalosome complex subunit 4                     |            |       |   |   |  |
| 305 | Q9BT78 | OS=Homo sapiens GN=COPS4 PE=1 SV=1 -<br>[CSN4_HUMAN]   | 55.6423941 | 9.36  | 3 | 3 |  |
|     |        | Glyceraldehyde-3-phosphate dehydrogenase               |            |       |   |   |  |
| 306 | P04406 | OS=Homo sapiens GN=GAPDH PE=1 SV=3 -                   | 55.5967551 | 14.93 | 3 | 3 |  |

|     |        |                                               |            |       |   |   |  |
|-----|--------|-----------------------------------------------|------------|-------|---|---|--|
|     |        | [G3P_HUMAN]                                   |            |       |   |   |  |
|     |        | Serum deprivation-response protein            |            |       |   |   |  |
| 307 | O95810 | OS=Homo sapiens GN=SDPR PE=1 SV=3 -           | 55.314541  | 11.76 | 4 | 4 |  |
|     |        | [SDPR_HUMAN]                                  |            |       |   |   |  |
|     |        | T-complex protein 1 subunit zeta OS=Homo      |            |       |   |   |  |
| 308 | P40227 | sapiens GN=CCT6A PE=1 SV=3 -                  | 55.31      | 3.01  | 1 | 1 |  |
|     |        | [TCPZ_HUMAN]                                  |            |       |   |   |  |
|     |        | Diphosphomevalonate decarboxylase             |            |       |   |   |  |
| 309 | P53602 | OS=Homo sapiens GN=MVD PE=1 SV=1 -            | 55.16      | 3.25  | 1 | 1 |  |
|     |        | [MVD1_HUMAN]                                  |            |       |   |   |  |
|     |        | Poly [ADP-ribose] polymerase 1 OS=Homo        |            |       |   |   |  |
| 310 | P09874 | sapiens GN=PARP1 PE=1 SV=4 -                  | 55.14      | 1.28  | 1 | 1 |  |
|     |        | [PARP1_HUMAN]                                 |            |       |   |   |  |
|     |        | Coatomer subunit delta OS=Homo sapiens        |            |       |   |   |  |
| 311 | P48444 | GN=ARCN1 PE=1 SV=1 - [COPD_HUMAN]             | 54.9719302 | 6.07  | 3 | 3 |  |
|     |        | Serine/threonine-protein phosphatase 2B       |            |       |   |   |  |
|     |        | catalytic subunit gamma isoform OS=Homo       |            |       |   |   |  |
| 312 | P48454 | sapiens GN=PPP3CC PE=1 SV=3 -                 | 54.78      | 4.1   | 1 | 2 |  |
|     |        | [PP2BC_HUMAN]                                 |            |       |   |   |  |
|     |        | UDP-N-acetylhexosamine                        |            |       |   |   |  |
|     |        | pyrophosphorylase-like protein 1 OS=Homo      |            |       |   |   |  |
| 313 | Q3KQV9 | sapiens GN=UAP1L1 PE=1 SV=2 -                 | 54.4039049 | 3.35  | 1 | 2 |  |
|     |        | [UAP1L_HUMAN]                                 |            |       |   |   |  |
|     |        | Branched-chain-amino-acid                     |            |       |   |   |  |
|     |        | aminotransferase, cytosolic OS=Homo           |            |       |   |   |  |
| 314 | P54687 | sapiens GN=BCAT1 PE=1 SV=3 -                  | 54.3088697 | 8.55  | 3 | 3 |  |
|     |        | [BCAT1_HUMAN]                                 |            |       |   |   |  |
|     |        | Electron transfer flavoprotein subunit alpha, |            |       |   |   |  |
|     |        | mitochondrial OS=Homo sapiens GN=ETFA         |            |       |   |   |  |
| 315 | P13804 | PE=1 SV=1 - [ETFA_HUMAN]                      | 54.21      | 5.71  | 1 | 1 |  |
|     |        | Beta-2-syntrophin OS=Homo sapiens             |            |       |   |   |  |
| 316 | Q13425 | GN=SNTB2 PE=1 SV=1 - [SNTB2_HUMAN]            | 54.1111912 | 8.89  | 5 | 5 |  |
|     |        | Suprabasin OS=Homo sapiens GN=SBSN            |            |       |   |   |  |
| 317 | Q6UWP8 | PE=1 SV=2 - [SBSN_HUMAN]                      | 53.27      | 9.15  | 1 | 1 |  |
|     |        | Mitochondrial ribonuclease P protein 1        |            |       |   |   |  |
| 318 | Q7L0Y3 | OS=Homo sapiens GN=TRMT10C PE=1               | 53.1837965 | 6.7   | 3 | 3 |  |
|     |        | SV=2 - [MRRP1_HUMAN]                          |            |       |   |   |  |
|     |        | Oxidation resistance protein 1 OS=Homo        |            |       |   |   |  |
| 319 | Q8N573 | sapiens GN=OXR1 PE=1 SV=2 -                   | 52.91      | 1.14  | 1 | 1 |  |
|     |        | [OXR1_HUMAN]                                  |            |       |   |   |  |
|     |        | Glutaryl-CoA dehydrogenase, mitochondrial     |            |       |   |   |  |
| 320 | Q92947 | OS=Homo sapiens GN=GCDH PE=1 SV=1 -           | 52.63      | 3.88  | 1 | 1 |  |
|     |        | [GCDH_HUMAN]                                  |            |       |   |   |  |
| 321 | Q01853 | Transitional endoplasmic reticulum ATPase     | 52.589879  | 2.48  | 2 | 2 |  |

|     |        |                                                                           |            |       |   |   |
|-----|--------|---------------------------------------------------------------------------|------------|-------|---|---|
|     |        | OS=Mus musculus GN=Vcp PE=1 SV=4 -<br>[TERA_MOUSE]                        |            |       |   |   |
|     |        | RNA 3'-terminal phosphate cyclase                                         |            |       |   |   |
| 322 | O00442 | OS=Homo sapiens GN=RTCA PE=1 SV=1 -<br>[RTCA_HUMAN]                       | 52.047561  | 10.11 | 3 | 3 |
|     |        | cAMP-dependent protein kinase type II-beta                                |            |       |   |   |
| 323 | P31323 | regulatory subunit OS=Homo sapiens<br>GN=PRKAR2B PE=1 SV=3 - [KAP3_HUMAN] | 51.96      | 7.89  | 2 | 2 |
|     |        | Pancreatic secretory granule membrane                                     |            |       |   |   |
| 324 | P55259 | major glycoprotein GP2 OS=Homo sapiens<br>GN=GP2 PE=2 SV=3 - [GP2_HUMAN]  | 51.91      | 1.68  | 1 | 1 |
|     |        | Lactotransferrin OS=Homo sapiens GN=LTF                                   |            |       |   |   |
| 325 | P02788 | PE=1 SV=6 - [TRFL_HUMAN]                                                  | 51.883332  | 3.8   | 3 | 3 |
|     |        | Eukaryotic translation initiation factor 3                                |            |       |   |   |
| 326 | O75821 | subunit G OS=Homo sapiens GN=EIF3G<br>PE=1 SV=2 - [EIF3G_HUMAN]           | 51.83      | 4.06  | 1 | 1 |
|     |        | Zinc finger protein ubi-d4 OS=Homo sapiens                                |            |       |   |   |
| 327 | Q92785 | GN=DPF2 PE=1 SV=2 - [REQU_HUMAN]                                          | 51.7641696 | 6.14  | 2 | 2 |
|     |        | U6 snRNA-associated Sm-like protein LSM4                                  |            |       |   |   |
| 328 | Q9Y4Z0 | OS=Homo sapiens GN=LSM4 PE=1 SV=1 -<br>[LSM4_HUMAN]                       | 51.3459655 | 5.04  | 1 | 1 |
|     |        | Lactoperoxidase OS=Homo sapiens GN=LPO                                    |            |       |   |   |
| 329 | P22079 | PE=1 SV=2 - [PERL_HUMAN]                                                  | 50.8615782 | 3.51  | 3 | 3 |
|     |        | Butyrophilin subfamily 1 member A1                                        |            |       |   |   |
| 330 | Q13410 | OS=Homo sapiens GN=BTN1A1 PE=1 SV=3<br>- [BT1A1_HUMAN]                    | 50.79      | 2.09  | 2 | 2 |
|     |        | Pleiotropic regulator 1 OS=Homo sapiens                                   |            |       |   |   |
| 331 | O43660 | GN=PLRG1 PE=1 SV=1 - [PLRG1_HUMAN]                                        | 50.5487776 | 19.07 | 6 | 6 |
|     |        | Sequestosome-1 OS=Homo sapiens                                            |            |       |   |   |
| 332 | Q13501 | GN=SQSTM1 PE=1 SV=1 -<br>[SQSTM_HUMAN]                                    | 50.29      | 9.32  | 2 | 2 |
|     |        | Amidophosphoribosyltransferase OS=Homo                                    |            |       |   |   |
| 333 | Q06203 | sapiens GN=PPAT PE=1 SV=1 -<br>[PUR1_HUMAN]                               | 49.99      | 1.74  | 1 | 1 |
|     |        | GA-binding protein alpha chain OS=Homo                                    |            |       |   |   |
| 334 | Q06546 | sapiens GN=GABPA PE=1 SV=1 -<br>[GABPA_HUMAN]                             | 49.75      | 8.37  | 2 | 2 |
|     |        | Thrombospondin-1 OS=Homo sapiens                                          |            |       |   |   |
| 335 | P07996 | GN=THBS1 PE=1 SV=2 - [TSP1_HUMAN]                                         | 49.69      | 1.03  | 1 | 1 |
|     |        | Acyl-CoA synthetase family member 3,                                      |            |       |   |   |
| 336 | Q4G176 | mitochondrial OS=Homo sapiens GN=ACSF3<br>PE=1 SV=3 - [ACSF3_HUMAN]       | 49.6486169 | 9.38  | 5 | 5 |
|     |        | DAZ-associated protein 1 OS=Homo sapiens                                  |            |       |   |   |
| 337 | Q96EP5 | GN=DAZAP1 PE=1 SV=1 - [DAZP1_HUMAN]                                       | 49.62      | 3.93  | 1 | 1 |

|     |        |                                                                                                                                                             |            |      |   |   |  |
|-----|--------|-------------------------------------------------------------------------------------------------------------------------------------------------------------|------------|------|---|---|--|
|     |        | Endonuclease domain-containing 1 protein                                                                                                                    |            |      |   |   |  |
| 338 | O94919 | OS=Homo sapiens GN=ENDOD1 PE=1 SV=2<br>- [ENDD1_HUMAN]                                                                                                      | 49.5043034 | 4.2  | 2 | 2 |  |
| 339 | O75131 | Copine-3 OS=Homo sapiens GN=CPNE3<br>PE=1 SV=1 - [CPNE3_HUMAN]                                                                                              | 49.3509161 | 3.35 | 1 | 2 |  |
| 340 | Q01581 | Hydroxymethylglutaryl-CoA synthase,<br>cytoplasmic OS=Homo sapiens GN=HMGC51<br>PE=1 SV=2 - [HMCS1_HUMAN]                                                   | 49.2332798 | 5.77 | 3 | 3 |  |
| 341 | P55209 | Nucleosome assembly protein 1-like 1<br>OS=Homo sapiens GN=NAP1L1 PE=1 SV=1<br>- [NP1L1_HUMAN]                                                              | 49.1       | 4.35 | 1 | 1 |  |
| 342 | Q92945 | Far upstream element-binding protein 2<br>OS=Homo sapiens GN=KHSRP PE=1 SV=4 -<br>[FUBP2_HUMAN]                                                             | 48.76      | 3.8  | 2 | 2 |  |
| 343 | P07305 | Histone H1.0 OS=Homo sapiens GN=H1F0<br>PE=1 SV=3 - [H10_HUMAN]                                                                                             | 48.68      | 6.7  | 1 | 1 |  |
| 344 | P36578 | 60S ribosomal protein L4 OS=Homo sapiens<br>GN=RPL4 PE=1 SV=5 - [RL4_HUMAN]                                                                                 | 48.4777681 | 4.68 | 2 | 2 |  |
| 345 | Q8NC56 | LEM domain-containing protein 2 OS=Homo<br>sapiens GN=LEMD2 PE=1 SV=1 -<br>[LEMD2_HUMAN]                                                                    | 48.27      | 5.37 | 2 | 2 |  |
| 346 | P18206 | Vinculin OS=Homo sapiens GN=VCL PE=1<br>SV=4 - [VINC_HUMAN]                                                                                                 | 48.21      | 1.23 | 1 | 1 |  |
| 347 | Q12824 | SWI/SNF-related matrix-associated actin-<br>dependent regulator of chromatin subfamily<br>B member 1 OS=Homo sapiens<br>GN=SMARCB1 PE=1 SV=2 - [SNF5_HUMAN] | 48.0954347 | 5.71 | 2 | 2 |  |
| 348 | Q14409 | Putative glycerol kinase 3 OS=Homo sapiens<br>GN=GK3P PE=5 SV=2 - [GLPK3_HUMAN]                                                                             | 48.09      | 2.89 | 2 | 2 |  |
| 349 | Q15050 | Ribosome biogenesis regulatory protein<br>homolog OS=Homo sapiens GN=RRS1 PE=1<br>SV=2 - [RRS1_HUMAN]                                                       | 47.9630797 | 6.85 | 2 | 2 |  |
| 350 | P46977 | Dolichyl-diphosphooligosaccharide--protein<br>glycosyltransferase subunit STT3A OS=Homo<br>sapiens GN=STT3A PE=1 SV=2 -<br>[STT3A_HUMAN]                    | 47.64      | 2.84 | 2 | 2 |  |
| 351 | P42785 | Lysosomal Pro-X carboxypeptidase<br>OS=Homo sapiens GN=PRCP PE=1 SV=1 -<br>[PCP_HUMAN]                                                                      | 47.5374303 | 4.44 | 3 | 3 |  |
| 352 | P17540 | Creatine kinase S-type, mitochondrial<br>OS=Homo sapiens GN=CKMT2 PE=1 SV=2 -<br>[KCRS_HUMAN]                                                               | 47.12      | 5.01 | 1 | 1 |  |
| 353 | Q13867 | Bleomycin hydrolase OS=Homo sapiens<br>GN=BLMH PE=1 SV=1 - [BLMH_HUMAN]                                                                                     | 47.09      | 2.42 | 1 | 1 |  |

|     |        |                                                                                   |            |       |   |   |  |
|-----|--------|-----------------------------------------------------------------------------------|------------|-------|---|---|--|
|     |        | Inositol polyphosphate 1-phosphatase                                              |            |       |   |   |  |
| 354 | P49441 | OS=Homo sapiens GN=INPP1 PE=1 SV=1 -<br>[INPP_HUMAN]                              | 46.95      | 3.01  | 1 | 1 |  |
|     |        | Transcription intermediary factor 1-beta                                          |            |       |   |   |  |
| 355 | Q13263 | OS=Homo sapiens GN=TRIM28 PE=1 SV=5<br>- [TIF1B_HUMAN]                            | 46.86      | 5.39  | 2 | 2 |  |
|     |        | Golgi-associated PDZ and coiled-coil motif-<br>containing protein OS=Homo sapiens | 46.7922432 | 8.44  | 4 | 4 |  |
| 356 | Q9HD26 | GN=GOPC PE=1 SV=1 - [GOPC_HUMAN]                                                  |            |       |   |   |  |
|     |        | Cystatin-A OS=Homo sapiens GN=CSTA                                                | 46.78      | 30.61 | 2 | 2 |  |
| 357 | P01040 | PE=1 SV=1 - [CYTA_HUMAN]                                                          |            |       |   |   |  |
|     |        | U3 small nucleolar RNA-interacting protein 2                                      |            |       |   |   |  |
| 358 | O43818 | OS=Homo sapiens GN=RRP9 PE=1 SV=1 -<br>[U3IP2_HUMAN]                              | 46.7209662 | 11.37 | 5 | 5 |  |
|     |        | Electrogenic sodium bicarbonate<br>cotransporter 1 OS=Homo sapiens                | 46.53      | 0.65  | 1 | 1 |  |
| 359 | Q9Y6R1 | GN=SLC4A4 PE=1 SV=1 - [S4A4_HUMAN]                                                |            |       |   |   |  |
|     |        | Plasminogen activator inhibitor 1 OS=Homo<br>sapiens GN=SERPINE1 PE=1 SV=1 -      | 46.4994552 | 10.45 | 3 | 3 |  |
| 360 | P05121 | [PAI1_HUMAN]                                                                      |            |       |   |   |  |
|     |        | Lactadherin OS=Homo sapiens GN=MFGEB8                                             | 46.4448105 | 3.36  | 1 | 1 |  |
| 361 | Q08431 | PE=1 SV=2 - [MFGM_HUMAN]                                                          |            |       |   |   |  |
|     |        | WD repeat-containing protein 1 OS=Homo<br>sapiens GN=WDR1 PE=1 SV=4 -             | 46.341979  | 3.47  | 2 | 2 |  |
| 362 | O75083 | [WDR1_HUMAN]                                                                      |            |       |   |   |  |
|     |        | Actin-related protein 2 OS=Homo sapiens                                           | 46.0448353 | 10.41 | 3 | 3 |  |
| 363 | P61160 | GN=ACTR2 PE=1 SV=1 - [ARP2_HUMAN]                                                 |            |       |   |   |  |
|     |        | tRNA pseudouridine synthase A,<br>mitochondrial OS=Homo sapiens GN=PUS1           | 45.8438739 | 5.15  | 2 | 2 |  |
| 364 | Q9Y606 | PE=1 SV=3 - [TRUA_HUMAN]                                                          |            |       |   |   |  |
|     |        | Ras-related protein Rab-11A OS=Homo<br>sapiens GN=RAB11A PE=1 SV=3 -              | 45.8       | 5.09  | 1 | 1 |  |
| 365 | P62491 | [RB11A_HUMAN]                                                                     |            |       |   |   |  |
|     |        | UTP--glucose-1-phosphate<br>uridylyltransferase OS=Homo sapiens                   | 45.7427892 | 10.43 | 5 | 5 |  |
| 366 | Q16851 | GN=UGP2 PE=1 SV=5 - [UGPA_HUMAN]                                                  |            |       |   |   |  |
|     |        | Elongation factor 2 OS=Homo sapiens                                               | 45.53      | 1.05  | 1 | 1 |  |
| 367 | P13639 | GN=EEF2 PE=1 SV=4 - [EF2_HUMAN]                                                   |            |       |   |   |  |
|     |        | Proteasomal ubiquitin receptor ADRM1                                              | 45.4398615 | 7.62  | 2 | 2 |  |
| 368 | Q16186 | OS=Homo sapiens GN=ADRM1 PE=1 SV=2 -<br>[ADRM1_HUMAN]                             |            |       |   |   |  |
|     |        | BUB3-interacting and GLEBS motif-containing<br>protein ZNF207 OS=Homo sapiens     | 45.1908383 | 6.9   | 3 | 3 |  |
| 369 | O43670 | GN=ZNF207 PE=1 SV=1 - [ZN207_HUMAN]                                               |            |       |   |   |  |



|     |        |                                                                                                                                   |            |       |   |   |
|-----|--------|-----------------------------------------------------------------------------------------------------------------------------------|------------|-------|---|---|
| 370 | O00410 | Importin-5 OS=Homo sapiens GN=IPO5<br>PE=1 SV=4 - [IPO5_HUMAN]<br>Thioredoxin reductase 2, mitochondrial                          | 45.14      | 1     | 1 | 1 |
| 371 | Q9NNW7 | OS=Homo sapiens GN=TXNRD2 PE=1 SV=3<br>- [TRXR2_HUMAN]                                                                            | 45.1       | 3.24  | 2 | 2 |
| 372 | Q9NZM1 | Myoferlin OS=Homo sapiens GN=MYOF<br>PE=1 SV=1 - [MYOF_HUMAN]<br>Heterogeneous nuclear ribonucleoprotein F                        | 44.9       | 0.63  | 1 | 1 |
| 373 | P52597 | OS=Homo sapiens GN=HNRNPF PE=1 SV=3<br>- [HNRPF_HUMAN]<br>Spectrin alpha chain, non-erythrocytic 1                                | 44.75      | 6.99  | 1 | 2 |
| 374 | Q13813 | OS=Homo sapiens GN=SPTAN1 PE=1 SV=3<br>- [SPTN1_HUMAN]<br>Parathyroid hormone-related protein                                     | 44.74      | 1.25  | 2 | 2 |
| 375 | P12272 | OS=Homo sapiens GN=PTHLH PE=1 SV=1 -<br>[PTHR_HUMAN]<br>40S ribosomal protein S30 OS=Homo                                         | 44.6783165 | 10.73 | 2 | 2 |
| 376 | P62861 | sapiens GN=FAU PE=1 SV=1 -<br>[RS30_HUMAN]<br>Alpha-1,6-mannosyl-glycoprotein 2-beta-N-                                           | 44.58      | 16.95 | 1 | 1 |
| 377 | Q10469 | acetylglucosaminyltransferase OS=Homo<br>sapiens GN=MGAT2 PE=1 SV=1 -<br>[MGAT2_HUMAN]<br>Keratin, type II cytoskeletal 4 OS=Homo | 44.4704886 | 6.04  | 3 | 3 |
| 378 | P19013 | sapiens GN=KRT4 PE=1 SV=4 -<br>[K2C4_HUMAN]<br>Flotillin-1 OS=Homo sapiens GN=FLOT1                                               | 44.343238  | 4.68  | 1 | 3 |
| 379 | O75955 | PE=1 SV=3 - [FLOT1_HUMAN]<br>Coronin-1A OS=Homo sapiens GN=CORO1A                                                                 | 44.2876136 | 14.52 | 4 | 4 |
| 380 | P31146 | PE=1 SV=4 - [COR1A_HUMAN]<br>Adenylosuccinate synthetase isozyme 2                                                                | 43.81      | 2.17  | 1 | 1 |
| 381 | P30520 | OS=Homo sapiens GN=ADSS PE=1 SV=3 -<br>[PURA2_HUMAN]<br>V-type proton ATPase subunit C 1 OS=Homo                                  | 43.59      | 7.68  | 3 | 3 |
| 382 | P21283 | sapiens GN=ATP6V1C1 PE=1 SV=4 -<br>[VATC1_HUMAN]<br>14-3-3 protein zeta/delta OS=Homo sapiens                                     | 43.5104821 | 9.16  | 3 | 3 |
| 383 | P63104 | GN=YWHAZ PE=1 SV=1 - [1433Z_HUMAN]<br>14-3-3 protein theta OS=Homo sapiens                                                        | 43.46      | 8.16  | 1 | 2 |
| 384 | P27348 | GN=YWHAQ PE=1 SV=1 - [1433T_HUMAN]<br>Phospholipase D3 OS=Homo sapiens                                                            | 43.46      | 6.53  | 1 | 2 |
| 385 | Q8IV08 | GN=PLD3 PE=1 SV=1 - [PLD3_HUMAN]<br>Heterogeneous nuclear ribonucleoprotein U                                                     | 43.4524395 | 4.08  | 2 | 2 |
| 386 | Q00839 | OS=Homo sapiens GN=HNRNPU PE=1 SV=6                                                                                               | 43.3       | 3.27  | 2 | 2 |

| - [HNRPU_HUMAN] |        |                                                                                                            |            |       |   |   |
|-----------------|--------|------------------------------------------------------------------------------------------------------------|------------|-------|---|---|
| 387             | Q9UNM6 | 26S proteasome non-ATPase regulatory subunit 13 OS=Homo sapiens GN=PSMD13 PE=1 SV=2 - [PSD13_HUMAN]        | 43.1715044 | 16.76 | 5 | 5 |
| 388             | Q9H173 | Nucleotide exchange factor SIL1 OS=Homo sapiens GN=SIL1 PE=1 SV=1 - [SIL1_HUMAN]                           | 43.16      | 4.34  | 2 | 2 |
| 389             | Q9UNS2 | COP9 signalosome complex subunit 3 OS=Homo sapiens GN=COPS3 PE=1 SV=3 - [CSN3_HUMAN]                       | 43.1       | 2.84  | 1 | 1 |
| 390             | Q02878 | 60S ribosomal protein L6 OS=Homo sapiens GN=RPL6 PE=1 SV=3 - [RL6_HUMAN]                                   | 43.07      | 10.76 | 3 | 3 |
| 391             | O00391 | Sulfhydryl oxidase 1 OS=Homo sapiens GN=QSOX1 PE=1 SV=3 - [QSOX1_HUMAN]                                    | 42.92      | 1.74  | 1 | 1 |
| 392             | P07339 | Cathepsin D OS=Homo sapiens GN=CTSD PE=1 SV=1 - [CATD_HUMAN]                                               | 42.89      | 5.1   | 2 | 2 |
| 393             | P83111 | Serine beta-lactamase-like protein LACTB, mitochondrial OS=Homo sapiens GN=LACTB PE=1 SV=2 - [LACTB_HUMAN] | 42.8       | 9.14  | 5 | 5 |
| 394             | O60814 | Histone H2B type 1-K OS=Homo sapiens GN=HIST1H2BK PE=1 SV=3 - [H2B1K_HUMAN]                                | 42.4990015 | 15.08 | 3 | 3 |
| 395             | P35613 | Basigin OS=Homo sapiens GN=BSG PE=1 SV=2 - [BASI_HUMAN]                                                    | 42.29      | 14.29 | 4 | 4 |
| 396             | Q9NWZ3 | Interleukin-1 receptor-associated kinase 4 OS=Homo sapiens GN=IRAK4 PE=1 SV=1 - [IRAK4_HUMAN]              | 42.25      | 3.04  | 1 | 1 |
| 397             | Q16658 | Fascin OS=Homo sapiens GN=FSCN1 PE=1 SV=3 - [FSCN1_HUMAN]                                                  | 42.2261706 | 5.27  | 2 | 2 |
| 398             | P51648 | Fatty aldehyde dehydrogenase OS=Homo sapiens GN=ALDH3A2 PE=1 SV=1 - [AL3A2_HUMAN]                          | 41.8       | 5.15  | 2 | 2 |
| 399             | P22314 | Ubiquitin-like modifier-activating enzyme 1 OS=Homo sapiens GN=UBA1 PE=1 SV=3 - [UBA1_HUMAN]               | 41.46      | 3.12  | 2 | 2 |
| 400             | P49327 | Fatty acid synthase OS=Homo sapiens GN=FASN PE=1 SV=3 - [FAS_HUMAN]                                        | 41.3272618 | 0.96  | 3 | 3 |
| 401             | Q9NSC5 | Homer protein homolog 3 OS=Homo sapiens GN=HOMER3 PE=1 SV=2 - [HOME3_HUMAN]                                | 41.25      | 18.28 | 6 | 6 |
| 402             | Q9P2A4 | ABI gene family member 3 OS=Homo sapiens GN=ABI3 PE=1 SV=2 - [ABI3_HUMAN]                                  | 41.2       | 4.1   | 1 | 1 |
| 403             | P02649 | Apolipoprotein E OS=Homo sapiens                                                                           | 41.14      | 2.84  | 1 | 1 |

|     |        |                                                                                                                                        |            |       |   |   |
|-----|--------|----------------------------------------------------------------------------------------------------------------------------------------|------------|-------|---|---|
|     |        | GN=APOE PE=1 SV=1 - [APOE_HUMAN]                                                                                                       |            |       |   |   |
| 404 | Q5T750 | Skin-specific protein 32 OS=Homo sapiens<br>GN=XP32 PE=1 SV=1 - [XP32_HUMAN]                                                           | 40.95      | 3.2   | 1 | 1 |
| 405 | Q6NXT2 | Histone H3.3C OS=Homo sapiens<br>GN=H3F3C PE=1 SV=3 - [H3C_HUMAN]                                                                      | 40.89      | 11.85 | 2 | 2 |
| 406 | P61221 | ATP-binding cassette sub-family E member 1<br>OS=Homo sapiens GN=ABCE1 PE=1 SV=1 -<br>[ABCE1_HUMAN]                                    | 40.72      | 2.84  | 1 | 1 |
| 407 | P49841 | Glycogen synthase kinase-3 beta OS=Homo<br>sapiens GN=GSK3B PE=1 SV=2 -<br>[GSK3B_HUMAN]                                               | 40.7       | 2.14  | 1 | 1 |
| 408 | Q14315 | Filamin-C OS=Homo sapiens GN=FLNC PE=1<br>SV=3 - [FLNC_HUMAN]                                                                          | 40.52      | 0.73  | 1 | 2 |
| 409 | Q9Y3B9 | RRP15-like protein OS=Homo sapiens<br>GN=RRP15 PE=1 SV=2 - [RRP15_HUMAN]                                                               | 40.47      | 3.9   | 1 | 1 |
| 410 | Q03426 | Mevalonate kinase OS=Homo sapiens<br>GN=MVK PE=1 SV=1 - [KIME_HUMAN]                                                                   | 40.46      | 2.78  | 1 | 1 |
| 411 | Q86YZ3 | Hornerin OS=Homo sapiens GN=HRNR PE=1<br>SV=2 - [HORN_HUMAN]                                                                           | 40.4011297 | 1.75  | 2 | 2 |
| 412 | P07477 | Trypsin-1 OS=Homo sapiens GN=PRSS1<br>PE=1 SV=1 - [TRY1_HUMAN]                                                                         | 40.39      | 8.1   | 1 | 1 |
| 413 | Q9HDC9 | Adipocyte plasma membrane-associated<br>protein OS=Homo sapiens GN=APMAP PE=1<br>SV=2 - [APMAP_HUMAN]                                  | 40.29      | 5.05  | 2 | 2 |
| 414 | Q8NBM8 | Prenylcysteine oxidase-like OS=Homo<br>sapiens GN=PCYOX1L PE=1 SV=2 -<br>[PCYXL_HUMAN]                                                 | 40.2       | 2.23  | 1 | 1 |
| 415 | Q9H1E3 | Nuclear ubiquitous casein and cyclin-<br>dependent kinase substrate 1 OS=Homo<br>sapiens GN=NUCKS1 PE=1 SV=1 -<br>[NUCKS_HUMAN]        | 40.13      | 3.7   | 1 | 1 |
| 416 | Q02750 | Dual specificity mitogen-activated protein<br>kinase kinase 1 OS=Homo sapiens<br>GN=MAP2K1 PE=1 SV=2 - [MP2K1_HUMAN]                   | 39.91      | 6.11  | 1 | 3 |
| 417 | Q4G0N4 | NAD kinase 2, mitochondrial OS=Homo<br>sapiens GN=NADK2 PE=1 SV=2 -<br>[NAKD2_HUMAN]                                                   | 39.7548955 | 10.18 | 3 | 3 |
| 418 | P11279 | Lysosome-associated membrane glycoprotein<br>1 OS=Homo sapiens GN=LAMP1 PE=1 SV=3<br>- [LAMP1_HUMAN]                                   | 39.69      | 2.64  | 1 | 1 |
| 419 | Q9P0J1 | [Pyruvate dehydrogenase [acetyl-<br>transferring]]-phosphatase 1, mitochondrial<br>OS=Homo sapiens GN=PDP1 PE=1 SV=3 -<br>[PDP1_HUMAN] | 39.58      | 3.91  | 2 | 2 |

|     |        |                                                                                                                            |            |       |   |   |
|-----|--------|----------------------------------------------------------------------------------------------------------------------------|------------|-------|---|---|
| 420 | P05141 | ADP/ATP translocase 2 OS=Homo sapiens<br>GN=SLC25A5 PE=1 SV=7 - [ADT2_HUMAN]<br>Intracellular hyaluronan-binding protein 4 | 39.5       | 4.03  | 1 | 1 |
| 421 | Q5JVS0 | OS=Homo sapiens GN=HABP4 PE=1 SV=1 -<br>[HABP4_HUMAN]                                                                      | 39.49      | 1.94  | 1 | 1 |
| 422 | P31151 | Protein S100-A7 OS=Homo sapiens<br>GN=S100A7 PE=1 SV=4 - [S10A7_HUMAN]                                                     | 39.44      | 10.89 | 1 | 1 |
| 423 | Q9UNH6 | Sorting nexin-7 OS=Homo sapiens GN=SNX7<br>PE=1 SV=1 - [SNX7_HUMAN]                                                        | 39.42      | 2.07  | 1 | 1 |
| 424 | Q86VN1 | Vacuolar protein-sorting-associated protein<br>36 OS=Homo sapiens GN=VPS36 PE=1<br>SV=1 - [VPS36_HUMAN]                    | 39.32      | 3.37  | 1 | 1 |
| 425 | Q9Y639 | Neuroplastin OS=Homo sapiens GN=NPTN<br>PE=1 SV=2 - [NPTN_HUMAN]                                                           | 39.29      | 2.51  | 1 | 1 |
| 426 | P12931 | Proto-oncogene tyrosine-protein kinase Src<br>OS=Homo sapiens GN=SRC PE=1 SV=3 -<br>[SRC_HUMAN]                            | 39.2620867 | 4.66  | 1 | 2 |
| 427 | P62937 | Peptidyl-prolyl cis-trans isomerase A<br>OS=Homo sapiens GN=PPIA PE=1 SV=2 -<br>[PPIA_HUMAN]                               | 39.09      | 5.45  | 1 | 1 |
| 428 | P45379 | Troponin T, cardiac muscle OS=Homo<br>sapiens GN=TNNT2 PE=1 SV=3 -<br>[TNNT2_HUMAN]                                        | 39.01      | 2.35  | 1 | 1 |
| 429 | P20700 | Lamin-B1 OS=Homo sapiens GN=LMNB1<br>PE=1 SV=2 - [LMNB1_HUMAN]                                                             | 38.9342098 | 5.8   | 3 | 3 |
| 430 | P14635 | G2/mitotic-specific cyclin-B1 OS=Homo<br>sapiens GN=CCNB1 PE=1 SV=1 -<br>[CCNB1_HUMAN]                                     | 38.9028213 | 4.39  | 2 | 2 |
| 431 | P61626 | Lysozyme C OS=Homo sapiens GN=LYZ<br>PE=1 SV=1 - [LYSC_HUMAN]                                                              | 38.87      | 12.84 | 2 | 2 |
| 432 | P52594 | Arf-GAP domain and FG repeat-containing<br>protein 1 OS=Homo sapiens GN=AGFG1<br>PE=1 SV=2 - [AGFG1_HUMAN]                 | 38.81      | 7.47  | 2 | 2 |
| 433 | Q9BQ67 | Glutamate-rich WD repeat-containing protein<br>1 OS=Homo sapiens GN=GRWD1 PE=1<br>SV=1 - [GRWD1_HUMAN]                     | 38.74      | 8.97  | 2 | 2 |
| 434 | Q9NWT1 | p21-activated protein kinase-interacting<br>protein 1 OS=Homo sapiens GN=PAK1IP1<br>PE=1 SV=2 - [PK1IP_HUMAN]              | 38.6756943 | 4.85  | 2 | 2 |
| 435 | P84085 | ADP-ribosylation factor 5 OS=Homo sapiens<br>GN=ARF5 PE=1 SV=2 - [ARF5_HUMAN]                                              | 38.58      | 5.56  | 1 | 1 |
| 436 | P13489 | Ribonuclease inhibitor OS=Homo sapiens<br>GN=RNH1 PE=1 SV=2 - [RINI_HUMAN]                                                 | 38.16      | 2.39  | 1 | 1 |
| 437 | P02748 | Complement component C9 OS=Homo                                                                                            | 37.98      | 2.15  | 1 | 1 |

|     |        |                                                                                    |            |      |   |   |
|-----|--------|------------------------------------------------------------------------------------|------------|------|---|---|
|     |        | sapiens GN=C9 PE=1 SV=2 - [CO9_HUMAN]                                              |            |      |   |   |
|     |        | L-lactate dehydrogenase A chain OS=Homo                                            |            |      |   |   |
| 438 | P00338 | sapiens GN=LDHA PE=1 SV=2 -<br>[LDHA_HUMAN]                                        | 37.92      | 3.01 | 1 | 1 |
|     |        | Equilibrative nucleoside transporter 1                                             |            |      |   |   |
| 439 | Q99808 | OS=Homo sapiens GN=SLC29A1 PE=1 SV=3<br>- [S29A1_HUMAN]                            | 37.85      | 1.97 | 1 | 1 |
|     |        | Nucleoprotein TPR OS=Homo sapiens                                                  |            |      |   |   |
| 440 | P12270 | GN=TPR PE=1 SV=3 - [TPR_HUMAN]                                                     | 37.85      | 0.42 | 1 | 1 |
|     |        | mRNA cap guanine-N7 methyltransferase                                              |            |      |   |   |
| 441 | O43148 | OS=Homo sapiens GN=RNMT PE=1 SV=1 -<br>[MCES_HUMAN]                                | 37.83      | 3.99 | 2 | 2 |
|     |        | ATP-dependent Clp protease ATP-binding<br>subunit clpX-like, mitochondrial OS=Homo |            |      |   |   |
| 442 | O76031 | sapiens GN=CLPX PE=1 SV=2 -<br>[CLPX_HUMAN]                                        | 37.75      | 2.05 | 1 | 1 |
|     |        | Cysteine protease ATG4B OS=Homo sapiens                                            |            |      |   |   |
| 443 | Q9Y4P1 | GN=ATG4B PE=1 SV=2 - [ATG4B_HUMAN]                                                 | 37.6       | 3.05 | 1 | 1 |
|     |        | Spectrin beta chain, non-erythrocytic 1                                            |            |      |   |   |
| 444 | Q01082 | OS=Homo sapiens GN=SPTBN1 PE=1 SV=2<br>- [SPTB2_HUMAN]                             | 37.53      | 0.38 | 1 | 1 |
|     |        | Protein AMBP OS=Homo sapiens GN=AMBP                                               |            |      |   |   |
| 445 | P02760 | PE=1 SV=1 - [AMBP_HUMAN]                                                           | 37.47      | 6.53 | 1 | 1 |
|     |        | Disintegrin and metalloproteinase domain-<br>containing protein 10 OS=Homo sapiens |            |      |   |   |
| 446 | O14672 | GN=ADAM10 PE=1 SV=1 - [ADA10_HUMAN]                                                | 37.29      | 2.01 | 1 | 1 |
|     |        | Putative gamma-glutamyltranspeptidase 3                                            |            |      |   |   |
| 447 | A6NGU5 | OS=Homo sapiens GN=GGT3P PE=5 SV=2 -<br>[GGT3_HUMAN]                               | 37.06      | 2.64 | 2 | 2 |
|     |        | Interleukin enhancer-binding factor 3                                              |            |      |   |   |
| 448 | Q12906 | OS=Homo sapiens GN=ILF3 PE=1 SV=3 -<br>[ILF3_HUMAN]                                | 36.8698437 | 3.8  | 3 | 3 |
|     |        | Actin-related protein 10 OS=Homo sapiens                                           |            |      |   |   |
| 449 | Q9NZ32 | GN=ACTR10 PE=1 SV=1 - [ARP10_HUMAN]                                                | 36.81      | 2.88 | 1 | 1 |
|     |        | Metalloproteinase inhibitor 3 OS=Homo                                              |            |      |   |   |
| 450 | P35625 | sapiens GN=TIMP3 PE=1 SV=2 -<br>[TIMP3_HUMAN]                                      | 36.62      | 4.27 | 1 | 1 |
|     |        | Serine--tRNA ligase, cytoplasmic OS=Homo                                           |            |      |   |   |
| 451 | P49591 | sapiens GN=SARS PE=1 SV=3 -<br>[SYSC_HUMAN]                                        | 36.49      | 3.31 | 2 | 2 |
|     |        | Autophagy protein 5 OS=Homo sapiens                                                |            |      |   |   |
| 452 | Q9H1Y0 | GN=ATG5 PE=1 SV=2 - [ATG5_HUMAN]                                                   | 36.48      | 3.27 | 1 | 1 |
|     |        | 26S protease regulatory subunit 8 OS=Homo                                          |            |      |   |   |
| 453 | P62195 | sapiens GN=PSMC5 PE=1 SV=1 -                                                       | 36.4263079 | 3.45 | 2 | 2 |

| [PRS8_HUMAN] |        |                                                                                                                            |            |       |   |   |
|--------------|--------|----------------------------------------------------------------------------------------------------------------------------|------------|-------|---|---|
| 454          | P20073 | Annexin A7 OS=Homo sapiens GN=ANXA7<br>PE=1 SV=3 - [ANXA7_HUMAN]                                                           | 36.39      | 2.25  | 1 | 1 |
| 455          | P29353 | SHC-transforming protein 1 OS=Homo<br>sapiens GN=SHC1 PE=1 SV=4 -<br>[SHC1_HUMAN]                                          | 36.33      | 2.74  | 1 | 1 |
| 456          | Q9H857 | 5'-nucleotidase domain-containing protein 2<br>OS=Homo sapiens GN=NT5DC2 PE=1 SV=1<br>- [NT5D2_HUMAN]                      | 36.31      | 4.81  | 2 | 2 |
| 457          | O75381 | Peroxisomal membrane protein PEX14<br>OS=Homo sapiens GN=PEX14 PE=1 SV=1 -<br>[PEX14_HUMAN]                                | 35.8962038 | 13.26 | 5 | 5 |
| 458          | Q8NB16 | Mixed lineage kinase domain-like protein<br>OS=Homo sapiens GN=MLKL PE=1 SV=1 -<br>[MLKL_HUMAN]                            | 35.69      | 2.55  | 1 | 1 |
| 459          | P08133 | Annexin A6 OS=Homo sapiens GN=ANXA6<br>PE=1 SV=3 - [ANXA6_HUMAN]                                                           | 35.68      | 2.53  | 2 | 2 |
| 460          | Q9H871 | Protein RMD5 homolog A OS=Homo sapiens<br>GN=RMND5A PE=1 SV=1 -<br>[RMD5A_HUMAN]                                           | 35.53      | 3.32  | 1 | 1 |
| 461          | Q8NFH3 | Nucleoporin Nup43 OS=Homo sapiens<br>GN=NUP43 PE=1 SV=1 - [NUP43_HUMAN]                                                    | 35.45      | 5     | 2 | 2 |
| 462          | Q9BTV4 | Transmembrane protein 43 OS=Homo<br>sapiens GN=TMEM43 PE=1 SV=1 -<br>[TMM43_HUMAN]                                         | 35.17      | 2.5   | 1 | 1 |
| 463          | P61978 | Heterogeneous nuclear ribonucleoprotein K<br>OS=Homo sapiens GN=HNRNPK PE=1 SV=1<br>- [HNRPK_HUMAN]                        | 34.99      | 4.97  | 1 | 1 |
| 464          | O60506 | Heterogeneous nuclear ribonucleoprotein Q<br>OS=Homo sapiens GN=SYNCRIP PE=1 SV=2<br>- [HNRPQ_HUMAN]                       | 34.91      | 6.9   | 2 | 4 |
| 465          | P16520 | Guanine nucleotide-binding protein<br>G(I)/G(S)/G(T) subunit beta-3 OS=Homo<br>sapiens GN=GNB3 PE=1 SV=1 -<br>[GBB3_HUMAN] | 34.81      | 2.94  | 1 | 1 |
| 466          | Q9H8G2 | Caspase activity and apoptosis inhibitor 1<br>OS=Homo sapiens GN=CAAP1 PE=1 SV=2 -<br>[CAAP1_HUMAN]                        | 34.72      | 2.22  | 1 | 1 |
| 467          | Q9NR50 | Translation initiation factor eIF-2B subunit<br>gamma OS=Homo sapiens GN=EIF2B3 PE=1<br>SV=1 - [EI2BG_HUMAN]               | 34.651683  | 6.42  | 3 | 3 |
| 468          | P54136 | Arginine--tRNA ligase, cytoplasmic OS=Homo<br>sapiens GN=RARS PE=1 SV=2 -<br>[SYRC_HUMAN]                                  | 34.65      | 4.85  | 3 | 3 |

|     |        |                                                                                                                      |            |       |   |   |
|-----|--------|----------------------------------------------------------------------------------------------------------------------|------------|-------|---|---|
| 469 | P61158 | Actin-related protein 3 OS=Homo sapiens<br>GN=ACTR3 PE=1 SV=3 - [ARP3_HUMAN]                                         | 34.54      | 2.15  | 1 | 1 |
| 470 | Q9H6F5 | Coiled-coil domain-containing protein 86<br>OS=Homo sapiens GN=CCDC86 PE=1 SV=1<br>- [CCD86_HUMAN]                   | 34.52      | 7.78  | 3 | 3 |
| 471 | P04899 | Guanine nucleotide-binding protein G(i)<br>subunit alpha-2 OS=Homo sapiens<br>GN=GNAI2 PE=1 SV=3 - [GNAI2_HUMAN]     | 34.44      | 10.42 | 2 | 3 |
| 472 | P23229 | Integrin alpha-6 OS=Homo sapiens<br>GN=ITGA6 PE=1 SV=5 - [ITA6_HUMAN]                                                | 34.4199148 | 2.12  | 2 | 2 |
| 473 | Q07020 | 60S ribosomal protein L18 OS=Homo<br>sapiens GN=RPL18 PE=1 SV=2 -<br>[RL18_HUMAN]                                    | 34.34      | 6.91  | 1 | 1 |
| 474 | P49356 | Protein farnesyltransferase subunit beta<br>OS=Homo sapiens GN=FNTB PE=1 SV=1 -<br>[FNTB_HUMAN]                      | 34.22      | 2.06  | 1 | 1 |
| 475 | Q9H0R6 | Glutamyl-tRNA(Gln) amidotransferase<br>subunit A, mitochondrial OS=Homo sapiens<br>GN=QRSL1 PE=1 SV=2 - [GATA_HUMAN] | 34.04      | 3.98  | 1 | 1 |
| 476 | Q01085 | Nucleolysin TIAR OS=Homo sapiens<br>GN=TIAL1 PE=1 SV=1 - [TIAR_HUMAN]                                                | 34.02      | 6.4   | 2 | 2 |
| 477 | O60443 | Non-syndromic hearing impairment protein 5<br>OS=Homo sapiens GN=DFNA5 PE=1 SV=2 -<br>[DFNA5_HUMAN]                  | 33.99      | 2.42  | 1 | 1 |
| 478 | P13667 | Protein disulfide-isomerase A4 OS=Homo<br>sapiens GN=PDIA4 PE=1 SV=2 -<br>[PDIA4_HUMAN]                              | 33.91      | 1.86  | 1 | 1 |
| 479 | Q6PJ69 | Tripartite motif-containing protein 65<br>OS=Homo sapiens GN=TRIM65 PE=1 SV=3<br>- [TRI65_HUMAN]                     | 33.88      | 2.13  | 1 | 1 |
| 480 | Q15813 | Tubulin-specific chaperone E OS=Homo<br>sapiens GN=TBCE PE=1 SV=1 -<br>[TBCE_HUMAN]                                  | 33.81      | 5.69  | 3 | 3 |
| 481 | P49023 | Paxillin OS=Homo sapiens GN=PXN PE=1<br>SV=3 - [PAXI_HUMAN]                                                          | 33.78      | 1.35  | 1 | 1 |
| 482 | P27105 | Erythrocyte band 7 integral membrane<br>protein OS=Homo sapiens GN=STOM PE=1<br>SV=3 - [STOM_HUMAN]                  | 33.71      | 2.43  | 1 | 1 |
| 483 | Q6Y288 | Beta-1,3-glucosyltransferase OS=Homo<br>sapiens GN=B3GALT PE=1 SV=2 -<br>[B3GLT_HUMAN]                               | 33.56      | 1.41  | 1 | 1 |
| 484 | Q9UHG2 | ProSAAS OS=Homo sapiens GN=PCSK1N<br>PE=1 SV=1 - [PCSK1_HUMAN]                                                       | 33.45      | 2.69  | 1 | 1 |
| 485 | Q8WXF1 | Paraspeckle component 1 OS=Homo sapiens                                                                              | 33.3298337 | 5.74  | 1 | 2 |

|     |        |                                                                                                                           |            |       |   |   |
|-----|--------|---------------------------------------------------------------------------------------------------------------------------|------------|-------|---|---|
|     |        | GN=PSPC1 PE=1 SV=1 - [PSPC1_HUMAN]                                                                                        |            |       |   |   |
| 486 | O76054 | SEC14-like protein 2 OS=Homo sapiens<br>GN=SEC14L2 PE=1 SV=1 - [S14L2_HUMAN]                                              | 33.29      | 1.99  | 1 | 1 |
| 487 | P42766 | 60S ribosomal protein L35 OS=Homo sapiens<br>GN=RPL35 PE=1 SV=2 - [RL35_HUMAN]                                            | 33.01      | 8.13  | 1 | 1 |
| 488 | Q96RQ1 | Endoplasmic reticulum-Golgi intermediate compartment protein 2 OS=Homo sapiens<br>GN=ERGIC2 PE=1 SV=2 - [ERGI2_HUMAN]     | 33         | 2.12  | 1 | 1 |
| 489 | P05556 | Integrin beta-1 OS=Homo sapiens<br>GN=ITGB1 PE=1 SV=2 - [ITB1_HUMAN]                                                      | 32.93      | 2.38  | 2 | 2 |
| 490 | Q9Y2T2 | AP-3 complex subunit mu-1 OS=Homo sapiens<br>GN=AP3M1 PE=1 SV=1 - [AP3M1_HUMAN]                                           | 32.79      | 13.4  | 3 | 3 |
| 491 | P36507 | Dual specificity mitogen-activated protein kinase kinase 2 OS=Homo sapiens<br>GN=MAP2K2 PE=1 SV=1 - [MP2K2_HUMAN]         | 32.72      | 6     | 1 | 3 |
| 492 | O00148 | ATP-dependent RNA helicase DDX39A OS=Homo sapiens<br>GN=DDX39A PE=1 SV=2 - [DX39A_HUMAN]                                  | 32.6277042 | 3.98  | 2 | 2 |
| 493 | O75879 | Glutamyl-tRNA(Gln) amidotransferase subunit B, mitochondrial OS=Homo sapiens<br>GN=GATB PE=1 SV=1 - [GATB_HUMAN]          | 32.34      | 3.41  | 2 | 2 |
| 494 | P49643 | DNA primase large subunit OS=Homo sapiens<br>GN=PRIM2 PE=1 SV=2 - [PRI2_HUMAN]                                            | 32.23      | 5.5   | 3 | 3 |
| 495 | Q9H488 | GDP-fucose protein O-fucosyltransferase 1 OS=Homo sapiens<br>GN=POFUT1 PE=1 SV=1 - [OFUT1_HUMAN]                          | 32.13      | 2.58  | 1 | 1 |
| 496 | Q9Y2Z4 | Tyrosine--tRNA ligase, mitochondrial OS=Homo sapiens<br>GN=YARS2 PE=1 SV=2 - [SYYM_HUMAN]                                 | 32.13      | 2.1   | 1 | 1 |
| 497 | P22830 | Ferrochelatase, mitochondrial OS=Homo sapiens<br>GN=FECH PE=1 SV=2 - [HEMH_HUMAN]                                         | 31.85      | 1.65  | 1 | 1 |
| 498 | P46060 | Ran GTPase-activating protein 1 OS=Homo sapiens<br>GN=RANGAP1 PE=1 SV=1 - [RAGP1_HUMAN]                                   | 31.84      | 2.04  | 1 | 1 |
| 499 | P63092 | Guanine nucleotide-binding protein G(s) subunit alpha isoforms short OS=Homo sapiens<br>GN=GNAS PE=1 SV=1 - [GNAS2_HUMAN] | 31.79585   | 11.93 | 3 | 4 |
| 500 | P16671 | Platelet glycoprotein 4 OS=Homo sapiens<br>GN=CD36 PE=1 SV=2 - [CD36_HUMAN]                                               | 31.65      | 1.69  | 1 | 1 |



|     |        |                                                                                                |            |       |   |   |
|-----|--------|------------------------------------------------------------------------------------------------|------------|-------|---|---|
| 501 | P26373 | 60S ribosomal protein L13 OS=Homo sapiens GN=RPL13 PE=1 SV=4 - [RL13_HUMAN]                    | 31.61      | 6.16  | 1 | 1 |
| 502 | Q9NVF7 | F-box only protein 28 OS=Homo sapiens GN=FBXO28 PE=1 SV=1 - [FBX28_HUMAN]                      | 31.61      | 3.8   | 1 | 1 |
| 503 | Q92466 | DNA damage-binding protein 2 OS=Homo sapiens GN=DDB2 PE=1 SV=1 - [DDB2_HUMAN]                  | 31.53      | 2.81  | 1 | 1 |
| 504 | O75616 | GTPase Era, mitochondrial OS=Homo sapiens GN=ERAL1 PE=1 SV=2 - [ERAL1_HUMAN]                   | 31.44      | 2.29  | 1 | 1 |
| 505 | P11308 | Transcriptional regulator ERG OS=Homo sapiens GN=ERG PE=1 SV=2 - [ERG_HUMAN]                   | 31.4       | 11.32 | 3 | 3 |
| 506 | P06241 | Tyrosine-protein kinase Fyn OS=Homo sapiens GN=FYN PE=1 SV=3 - [FYN_HUMAN]                     | 31.3991824 | 3.54  | 1 | 2 |
| 507 | Q96P63 | Serpin B12 OS=Homo sapiens GN=SERPINB12 PE=1 SV=1 - [SPB12_HUMAN]                              | 31.38      | 2.47  | 1 | 1 |
| 508 | P62942 | Peptidyl-prolyl cis-trans isomerase FKBP1A OS=Homo sapiens GN=FKBP1A PE=1 SV=2 - [FKB1A_HUMAN] | 31.38      | 12.96 | 1 | 1 |
| 509 | Q15084 | Protein disulfide-isomerase A6 OS=Homo sapiens GN=PDIA6 PE=1 SV=1 - [PDIA6_HUMAN]              | 31.29      | 3.86  | 1 | 1 |
| 510 | Q8NCH0 | Carbohydrate sulfotransferase 14 OS=Homo sapiens GN=CHST14 PE=1 SV=2 - [CHSTE_HUMAN]           | 31.23      | 7.45  | 2 | 2 |
| 511 | O15504 | Nucleoporin-like protein 2 OS=Homo sapiens GN=NUPL2 PE=1 SV=1 - [NUPL2_HUMAN]                  | 30.65      | 1.89  | 1 | 1 |
| 512 | Q9BXS6 | Nucleolar and spindle-associated protein 1 OS=Homo sapiens GN=NUSAP1 PE=1 SV=1 - [NUSAP_HUMAN] | 30.64      | 2.95  | 1 | 1 |
| 513 | P12273 | Prolactin-inducible protein OS=Homo sapiens GN=PIP PE=1 SV=1 - [PIP_HUMAN]                     | 30.61      | 10.96 | 1 | 1 |
| 514 | Q15904 | V-type proton ATPase subunit S1 OS=Homo sapiens GN=ATP6AP1 PE=1 SV=2 - [VAS1_HUMAN]            | 30.58      | 8.09  | 3 | 3 |
| 515 | Q15796 | Mothers against decapentaplegic homolog 2 OS=Homo sapiens GN=SMAD2 PE=1 SV=1 - [SMAD2_HUMAN]   | 30.56      | 5.14  | 2 | 2 |
| 516 | Q16342 | Programmed cell death protein 2 OS=Homo sapiens GN=PDCD2 PE=1 SV=2 -                           | 30.47      | 3.49  | 1 | 1 |

| [PDCD2_HUMAN] |        |                                                                                                                             |            |      |   |   |
|---------------|--------|-----------------------------------------------------------------------------------------------------------------------------|------------|------|---|---|
| 517           | Q9NTK5 | Obg-like ATPase 1 OS=Homo sapiens<br>GN=OLA1 PE=1 SV=2 - [OLA1_HUMAN]                                                       | 30.06      | 4.55 | 2 | 2 |
| 518           | O15417 | Trinucleotide repeat-containing gene 18<br>protein OS=Homo sapiens GN=TNRC18<br>PE=1 SV=3 - [TNC18_HUMAN]                   | 30.05      | 0.2  | 1 | 1 |
| 519           | Q9Y312 | Protein AAR2 homolog OS=Homo sapiens<br>GN=AAR2 PE=1 SV=2 - [AAR2_HUMAN]                                                    | 29.98      | 4.95 | 1 | 1 |
| 520           | P09382 | Galectin-1 OS=Homo sapiens GN=LGALS1<br>PE=1 SV=2 - [LEG1_HUMAN]                                                            | 29.64      | 5.93 | 1 | 1 |
| 521           | P28340 | DNA polymerase delta catalytic subunit<br>OS=Homo sapiens GN=POLD1 PE=1 SV=2 -<br>[DPOD1_HUMAN]                             | 29.63      | 0.54 | 1 | 1 |
| 522           | Q9Y4P3 | Transducin beta-like protein 2 OS=Homo<br>sapiens GN=TBL2 PE=1 SV=1 -<br>[TBL2_HUMAN]                                       | 29.49      | 2.91 | 1 | 1 |
| 523           | P40939 | Trifunctional enzyme subunit alpha,<br>mitochondrial OS=Homo sapiens<br>GN=HADHA PE=1 SV=2 - [ECHA_HUMAN]                   | 29.41      | 2.49 | 2 | 2 |
| 524           | P45880 | Voltage-dependent anion-selective channel<br>protein 2 OS=Homo sapiens GN=VDAC2<br>PE=1 SV=2 - [VDAC2_HUMAN]                | 29.27      | 4.08 | 1 | 1 |
| 525           | O00273 | DNA fragmentation factor subunit alpha<br>OS=Homo sapiens GN=DFFA PE=1 SV=1 -<br>[DFFA_HUMAN]                               | 29.01      | 4.83 | 1 | 1 |
| 526           | P49748 | Very long-chain specific acyl-CoA<br>dehydrogenase, mitochondrial OS=Homo<br>sapiens GN=ACADVL PE=1 SV=1 -<br>[ACADV_HUMAN] | 29         | 2.29 | 1 | 1 |
| 527           | Q9Y2K7 | Lysine-specific demethylase 2A OS=Homo<br>sapiens GN=KDM2A PE=1 SV=3 -<br>[KDM2A_HUMAN]                                     | 28.99      | 0.52 | 1 | 1 |
| 528           | Q99519 | Sialidase-1 OS=Homo sapiens GN=NEU1<br>PE=1 SV=1 - [NEUR1_HUMAN]                                                            | 28.98      | 5.54 | 2 | 2 |
| 529           | B2RXH8 | Heterogeneous nuclear ribonucleoprotein C-<br>like 2 OS=Homo sapiens GN=HNRNPCL2<br>PE=2 SV=1 - [HNRC2_HUMAN]               | 28.72      | 4.1  | 1 | 1 |
| 530           | P42167 | Lamina-associated polypeptide 2, isoforms<br>beta/gamma OS=Homo sapiens GN=TMPO<br>PE=1 SV=2 - [LAP2B_HUMAN]                | 28.47      | 2.64 | 1 | 1 |
| 531           | Q9Y512 | Sorting and assembly machinery component<br>50 homolog OS=Homo sapiens GN=SAMM50<br>PE=1 SV=3 - [SAM50_HUMAN]               | 28.42      | 2.35 | 1 | 1 |
| 532           | Q00587 | Cdc42 effector protein 1 OS=Homo sapiens                                                                                    | 28.4031997 | 7.67 | 3 | 3 |

|     |        |                                                                                                                                                                               |            |      |   |   |  |
|-----|--------|-------------------------------------------------------------------------------------------------------------------------------------------------------------------------------|------------|------|---|---|--|
|     |        | GN=CDC42EP1 PE=1 SV=1 -<br>[BORG5_HUMAN]<br>Beta-hexosaminidase subunit alpha                                                                                                 |            |      |   |   |  |
| 533 | P06865 | OS=Homo sapiens GN=HEXA PE=1 SV=2 -<br>[HEXA_HUMAN]<br>Acetyl-CoA acetyltransferase, mitochondrial                                                                            | 28.38      | 3.59 | 2 | 2 |  |
| 534 | P24752 | OS=Homo sapiens GN=ACAT1 PE=1 SV=1 -<br>[THIL_HUMAN]<br>Splicing factor U2AF 65 kDa subunit                                                                                   | 28.38      | 3.04 | 1 | 1 |  |
| 535 | P26368 | OS=Homo sapiens GN=U2AF2 PE=1 SV=4 -<br>[U2AF2_HUMAN]<br>Zinc finger protein ZPR1 OS=Homo sapiens<br>GN=ZPR1 PE=1 SV=1 - [ZPR1_HUMAN]                                         | 28.34      | 2.11 | 1 | 1 |  |
| 536 | O75312 | Translation initiation factor eIF-2B subunit<br>delta OS=Homo sapiens GN=EIF2B4 PE=1<br>SV=2 - [EI2BD_HUMAN]                                                                  | 28.3       | 3.49 | 1 | 1 |  |
| 537 | Q9UI10 | Protein TFG OS=Homo sapiens GN=TFG<br>PE=1 SV=2 - [TFG_HUMAN]<br>Ras GTPase-activating-like protein IQGAP1                                                                    | 28.25      | 8.8  | 3 | 3 |  |
| 538 | Q92734 | OS=Homo sapiens GN=IQGAP1 PE=1 SV=1<br>- [IQGA1_HUMAN]<br>Heterogeneous nuclear ribonucleoprotein L                                                                           | 28.25      | 1.5  | 1 | 1 |  |
| 539 | P46940 | OS=Homo sapiens GN=HNRNPL PE=1 SV=2<br>- [HNRPL_HUMAN]<br>Drebrin OS=Homo sapiens GN=DBN1 PE=1<br>SV=4 - [DREB_HUMAN]                                                         | 28.16      | 0.6  | 1 | 1 |  |
| 540 | P14866 | OS=Homo sapiens GN=ESAM PE=1 SV=1 -<br>[ESAM_HUMAN]<br>Src substrate cortactin OS=Homo sapiens<br>GN=CTTN PE=1 SV=2 - [SRC8_HUMAN]                                            | 28.09      | 2.89 | 2 | 2 |  |
| 541 | Q16643 | OS=Homo sapiens GN=DNB1 PE=1<br>SV=4 - [DREB_HUMAN]<br>Endothelial cell-selective adhesion molecule                                                                           | 28.03      | 2.77 | 2 | 2 |  |
| 542 | Q96AP7 | OS=Homo sapiens GN=ESAM PE=1 SV=1 -<br>[ESAM_HUMAN]<br>Src substrate cortactin OS=Homo sapiens<br>GN=CTTN PE=1 SV=2 - [SRC8_HUMAN]                                            | 27.8405846 | 9.49 | 2 | 2 |  |
| 543 | Q14247 | Transketolase OS=Homo sapiens GN=TKT<br>PE=1 SV=3 - [TKT_HUMAN]<br>Peroxiredoxin-2 OS=Homo sapiens<br>GN=PRDX2 PE=1 SV=5 - [PRDX2_HUMAN]                                      | 27.76      | 1.27 | 1 | 1 |  |
| 544 | P29401 | OS=Homo sapiens GN=TKT<br>PE=1 SV=3 - [TKT_HUMAN]<br>Peroxiredoxin-2 OS=Homo sapiens<br>GN=PRDX2 PE=1 SV=5 - [PRDX2_HUMAN]                                                    | 27.55      | 4.98 | 2 | 2 |  |
| 545 | P32119 | OS=Homo sapiens GN=PRDX2 PE=1 SV=5 -<br>[PRDX2_HUMAN]<br>Chromosome transmission fidelity protein 8<br>homolog isoform 2 OS=Homo sapiens<br>GN=CTF8 PE=1 SV=1 - [CTF8A_HUMAN] | 27.53      | 4.55 | 1 | 1 |  |
| 546 | P0CG12 | OS=Homo sapiens GN=CTF8 PE=1 SV=1 -<br>[CTF8A_HUMAN]<br>Calnexin OS=Homo sapiens GN=CANX PE=1<br>SV=2 - [CALX_HUMAN]                                                          | 27.48      | 1.34 | 1 | 1 |  |
| 547 | P27824 | OS=Homo sapiens GN=CANX PE=1<br>SV=2 - [CALX_HUMAN]<br>Alpha-actinin-4 OS=Homo sapiens<br>GN=ACTN4 PE=1 SV=2 - [ACTN4_HUMAN]                                                  | 27.31      | 2.7  | 1 | 1 |  |
| 548 | O43707 | OS=Homo sapiens GN=ACTN4 PE=1 SV=2 -<br>[ACTN4_HUMAN]<br>Peptidase inhibitor 15 OS=Homo sapiens<br>GN=PI15 PE=1 SV=1 - [PI15_HUMAN]                                           | 27.2       | 2.85 | 1 | 2 |  |
| 549 | O43692 | OS=Homo sapiens GN=PI15 PE=1 SV=1 -<br>[PI15_HUMAN]                                                                                                                           | 27.15      | 3.88 | 1 | 1 |  |

|     |        |                                                                                                             |            |      |   |   |
|-----|--------|-------------------------------------------------------------------------------------------------------------|------------|------|---|---|
| 550 | P05089 | Arginase-1 OS=Homo sapiens GN=ARG1<br>PE=1 SV=2 - [ARGI1_HUMAN]                                             | 27.06      | 3.42 | 1 | 1 |
| 551 | Q8NBM4 | Ubiquitin-associated domain-containing<br>protein 2 OS=Homo sapiens GN=UBAC2<br>PE=1 SV=1 - [UBAC2_HUMAN]   | 26.81      | 2.33 | 1 | 1 |
| 552 | Q12874 | Splicing factor 3A subunit 3 OS=Homo<br>sapiens GN=SF3A3 PE=1 SV=1 -<br>[SF3A3_HUMAN]                       | 26.8       | 2.4  | 1 | 1 |
| 553 | Q6YN16 | Hydroxysteroid dehydrogenase-like protein 2<br>OS=Homo sapiens GN=HSDL2 PE=1 SV=1 -<br>[HSDL2_HUMAN]        | 26.78      | 4.31 | 1 | 1 |
| 554 | P35221 | Catenin alpha-1 OS=Homo sapiens<br>GN=CTNNA1 PE=1 SV=1 - [CTNA1_HUMAN]                                      | 26.69      | 1.21 | 1 | 1 |
| 555 | P39019 | 40S ribosomal protein S19 OS=Homo<br>sapiens GN=RPS19 PE=1 SV=2 -<br>[RS19_HUMAN]                           | 26.64      | 6.9  | 1 | 1 |
| 556 | Q9UNP9 | Peptidyl-prolyl cis-trans isomerase E<br>OS=Homo sapiens GN=PPIE PE=1 SV=1 -<br>[PPIE_HUMAN]                | 26.53      | 2.99 | 1 | 1 |
| 557 | Q8ND56 | Protein LSM14 homolog A OS=Homo sapiens<br>GN=LSM14A PE=1 SV=3 - [LS14A_HUMAN]                              | 26.4       | 9.72 | 4 | 4 |
| 558 | Q969S3 | Zinc finger protein 622 OS=Homo sapiens<br>GN=ZNF622 PE=1 SV=1 - [ZN622_HUMAN]                              | 26.27      | 3.14 | 1 | 1 |
| 559 | O75915 | PRA1 family protein 3 OS=Homo sapiens<br>GN=ARL6IP5 PE=1 SV=1 - [PRAF3_HUMAN]                               | 26.26      | 5.85 | 1 | 1 |
| 560 | P84098 | 60S ribosomal protein L19 OS=Homo<br>sapiens GN=RPL19 PE=1 SV=1 -<br>[RL19_HUMAN]                           | 26.22      | 4.59 | 1 | 1 |
| 561 | P31944 | Caspase-14 OS=Homo sapiens GN=CASP14<br>PE=1 SV=2 - [CASPE_HUMAN]                                           | 25.62      | 8.68 | 2 | 2 |
| 562 | Q09666 | Neuroblast differentiation-associated protein<br>AHNAK OS=Homo sapiens GN=AHNAK PE=1<br>SV=2 - [AHNK_HUMAN] | 25.53      | 2.14 | 1 | 1 |
| 563 | Q9UGI8 | Testin OS=Homo sapiens GN=TES PE=1<br>SV=1 - [TES_HUMAN]                                                    | 25.33      | 2.85 | 1 | 1 |
| 564 | P37023 | Serine/threonine-protein kinase receptor R3<br>OS=Homo sapiens GN=ACVRL1 PE=1 SV=2<br>- [ACVL1_HUMAN]       | 24.3       | 2.19 | 1 | 1 |
| 565 | P39748 | Flap endonuclease 1 OS=Homo sapiens<br>GN=FEN1 PE=1 SV=1 - [FEN1_HUMAN]                                     | 24.1       | 2.89 | 1 | 1 |
| 566 | P12081 | Histidine--tRNA ligase, cytoplasmic<br>OS=Homo sapiens GN=HARS PE=1 SV=2 -<br>[SYHC_HUMAN]                  | 23.93      | 2.95 | 2 | 2 |
| 567 | Q00610 | Clathrin heavy chain 1 OS=Homo sapiens                                                                      | 23.8822803 | 1.37 | 2 | 2 |

|     |        |                                                                                                                                                                |       |      |   |   |
|-----|--------|----------------------------------------------------------------------------------------------------------------------------------------------------------------|-------|------|---|---|
|     |        | GN=CLTC PE=1 SV=5 - [CLH1_HUMAN]<br>Stomatin-like protein 2, mitochondrial                                                                                     |       |      |   |   |
| 568 | Q9UJZ1 | OS=Homo sapiens GN=STOML2 PE=1 SV=1<br>- [STML2_HUMAN]                                                                                                         | 23.88 | 4.49 | 1 | 1 |
| 569 | P08962 | CD63 antigen OS=Homo sapiens GN=CD63<br>PE=1 SV=2 - [CD63_HUMAN]                                                                                               | 23.86 | 4.2  | 1 | 1 |
| 570 | Q15075 | Early endosome antigen 1 OS=Homo sapiens<br>GN=EEA1 PE=1 SV=2 - [EEA1_HUMAN]                                                                                   | 23.85 | 0.85 | 1 | 1 |
| 571 | Q8N6T3 | ADP-ribosylation factor GTPase-activating<br>protein 1 OS=Homo sapiens GN=ARFGAP1<br>PE=1 SV=2 - [ARFG1_HUMAN]                                                 | 23.63 | 8.13 | 2 | 2 |
| 572 | Q15645 | Pachytene checkpoint protein 2 homolog<br>OS=Homo sapiens GN=TRIP13 PE=1 SV=2 -<br>[PCH2_HUMAN]                                                                | 23.61 | 3.01 | 1 | 1 |
| 573 | Q9Y6M1 | Insulin-like growth factor 2 mRNA-binding<br>protein 2 OS=Homo sapiens GN=IGF2BP2<br>PE=1 SV=2 - [IF2B2_HUMAN]                                                 | 23.47 | 3.67 | 2 | 2 |
| 574 | Q5T280 | Putative methyltransferase C9orf114<br>OS=Homo sapiens GN=C9orf114 PE=1 SV=3<br>- [CI114_HUMAN]                                                                | 23.43 | 5.85 | 2 | 2 |
| 575 | P01857 | Ig gamma-1 chain C region OS=Homo<br>sapiens GN=IGHG1 PE=1 SV=1 -<br>[IGHG1_HUMAN]                                                                             | 22.78 | 5.15 | 1 | 1 |
| 576 | Q6UY18 | Leucine-rich repeat and immunoglobulin-like<br>domain-containing nogo receptor-interacting<br>protein 4 OS=Homo sapiens GN=LINGO4<br>PE=2 SV=1 - [LIGO4_HUMAN] | 22.71 | 1.18 | 1 | 1 |
| 577 | Q9P2K5 | Myelin expression factor 2 OS=Homo sapiens<br>GN=MYEF2 PE=1 SV=3 - [MYEF2_HUMAN]                                                                               | 22.66 | 1.83 | 1 | 1 |
| 578 | Q9H0B8 | Cysteine-rich secretory protein LCCL domain-<br>containing 2 OS=Homo sapiens<br>GN=CRISPLD2 PE=2 SV=1 -<br>[CRLD2_HUMAN]                                       | 22.43 | 3.22 | 2 | 2 |
| 579 | Q96B36 | Proline-rich AKT1 substrate 1 OS=Homo<br>sapiens GN=AKT1S1 PE=1 SV=1 -<br>[AKTS1_HUMAN]                                                                        | 22.14 | 4.69 | 1 | 1 |
| 580 | P27797 | Calreticulin OS=Homo sapiens GN=CALR<br>PE=1 SV=1 - [CALR_HUMAN]                                                                                               | 22.1  | 2.88 | 1 | 1 |
| 581 | Q9H223 | EH domain-containing protein 4 OS=Homo<br>sapiens GN=EHD4 PE=1 SV=1 -<br>[EHD4_HUMAN]                                                                          | 21.61 | 2.03 | 1 | 1 |
| 582 | Q13283 | Ras GTPase-activating protein-binding<br>protein 1 OS=Homo sapiens GN=G3BP1<br>PE=1 SV=1 - [G3BP1_HUMAN]                                                       | 21.57 | 3.43 | 1 | 1 |

|     |        |                                                                                                         |       |      |   |   |
|-----|--------|---------------------------------------------------------------------------------------------------------|-------|------|---|---|
| 583 | P07737 | Profilin-1 OS=Homo sapiens GN=PFN1 PE=1<br>SV=2 - [PROF1_HUMAN]                                         | 21.03 | 8.57 | 1 | 1 |
| 584 | Q96CW1 | AP-2 complex subunit mu OS=Homo sapiens<br>GN=AP2M1 PE=1 SV=2 - [AP2M1_HUMAN]                           | 20.36 | 1.61 | 1 | 1 |
| 585 | O60551 | Glycylpeptide N-tetradecanoyltransferase 2<br>OS=Homo sapiens GN=NMT2 PE=1 SV=1 -<br>[NMT2_HUMAN]       | 18.25 | 3.61 | 2 | 2 |
| 586 | P21589 | 5'-nucleotidase OS=Homo sapiens GN=NT5E<br>PE=1 SV=1 - [5NTD_HUMAN]                                     | 17.69 | 2.61 | 1 | 1 |
| 587 | Q9UKN8 | General transcription factor 3C polypeptide 4<br>OS=Homo sapiens GN=GTF3C4 PE=1 SV=2<br>- [TF3C4_HUMAN] | 17.58 | 0.85 | 1 | 1 |

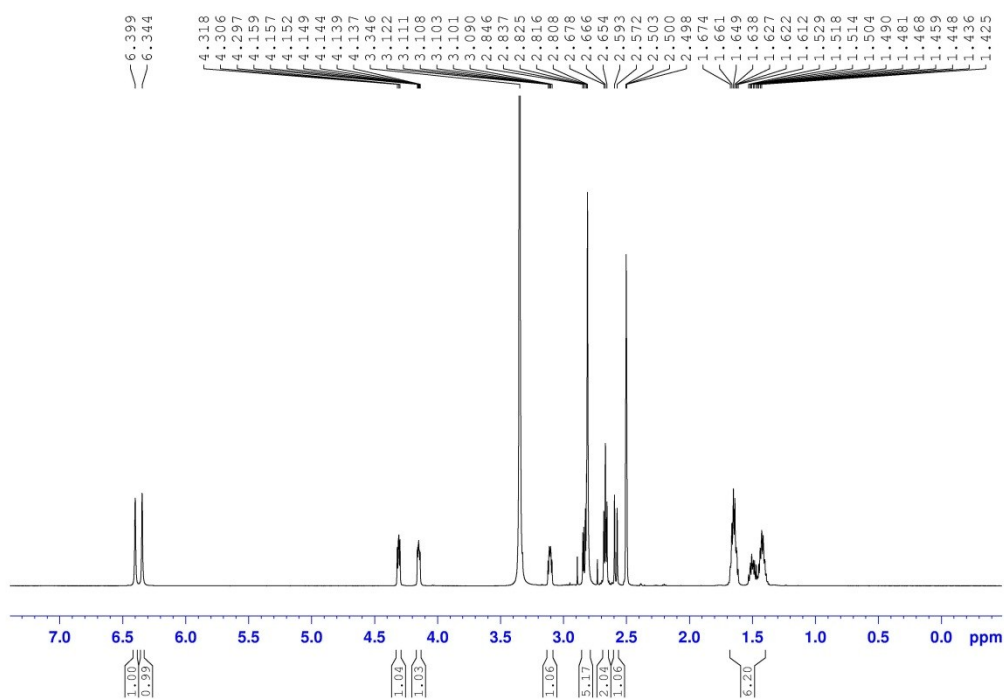

**Fig. 1.** <sup>1</sup>H NMR of compound ii

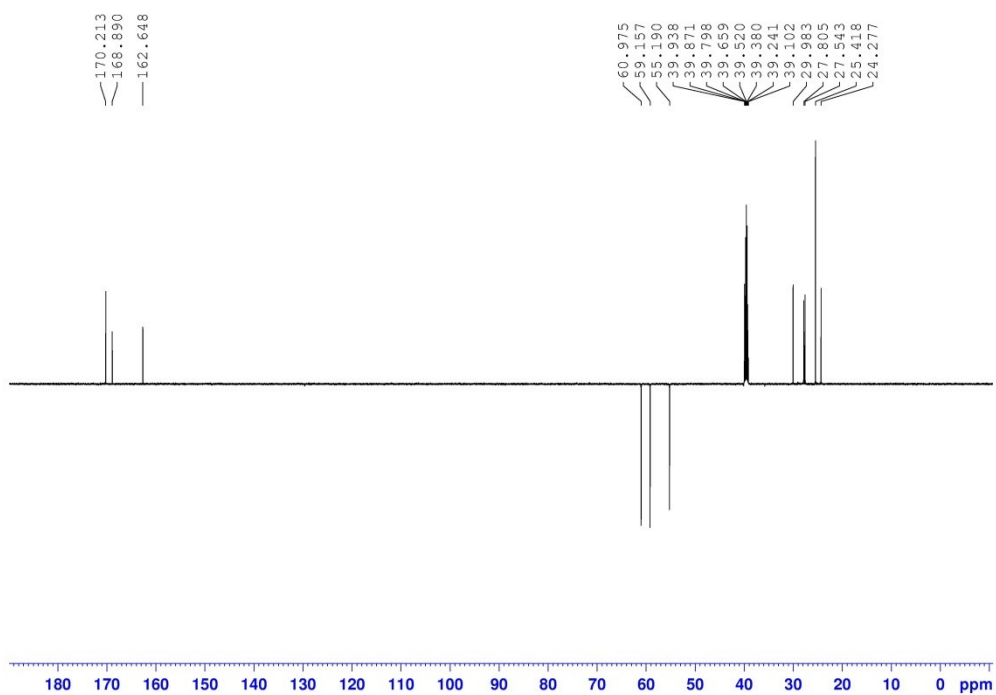

Fig. 2.  $^{13}\text{C}$  NMR of compound ii

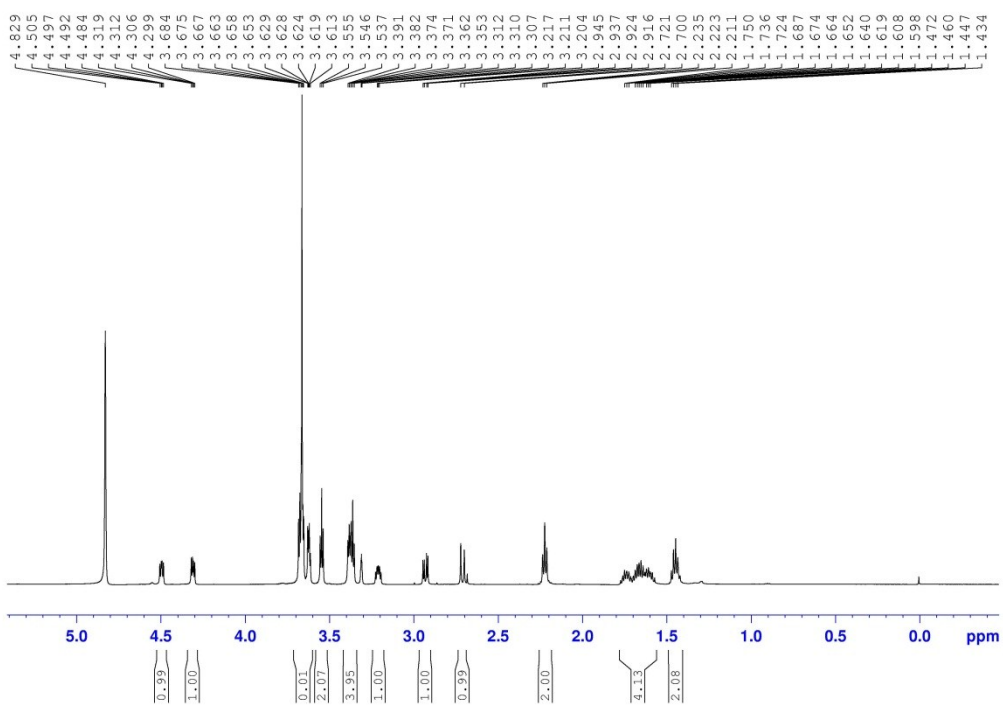

Fig. 3.  $^1\text{H}$  NMR of compound iii

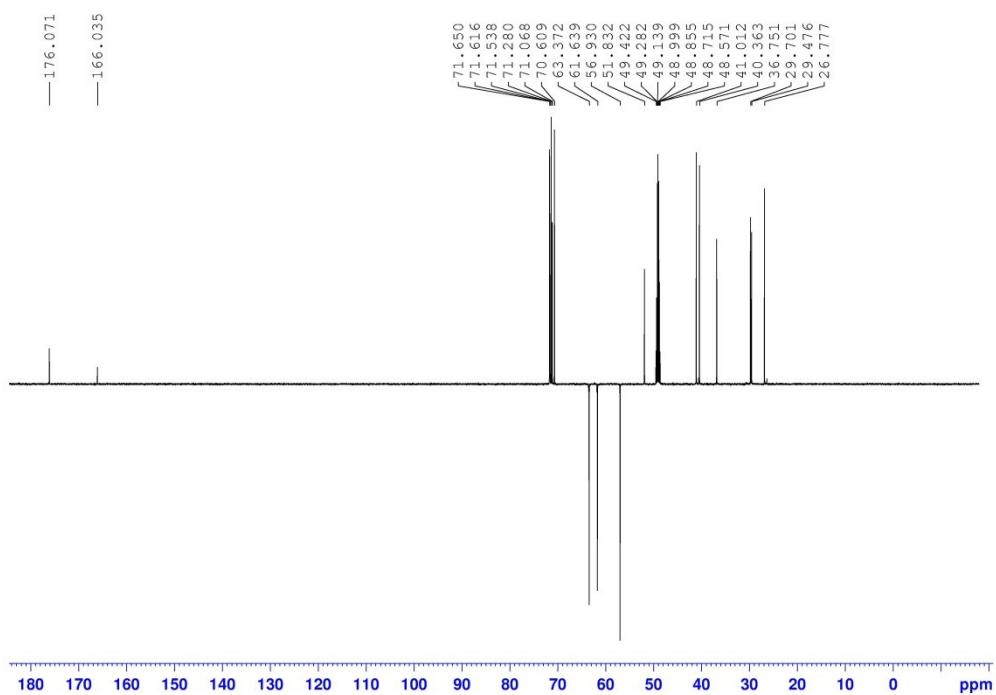

Fig. 4.  $^{13}\text{C}$  NMR of compound iii

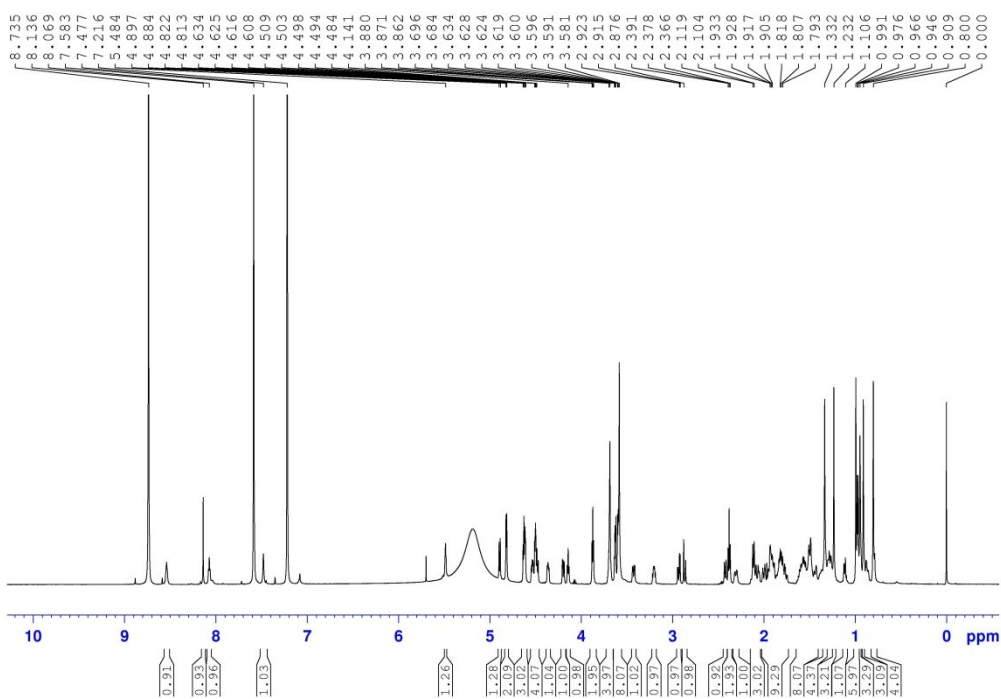

Fig. 5.  $^1\text{H}$  NMR of compound VI



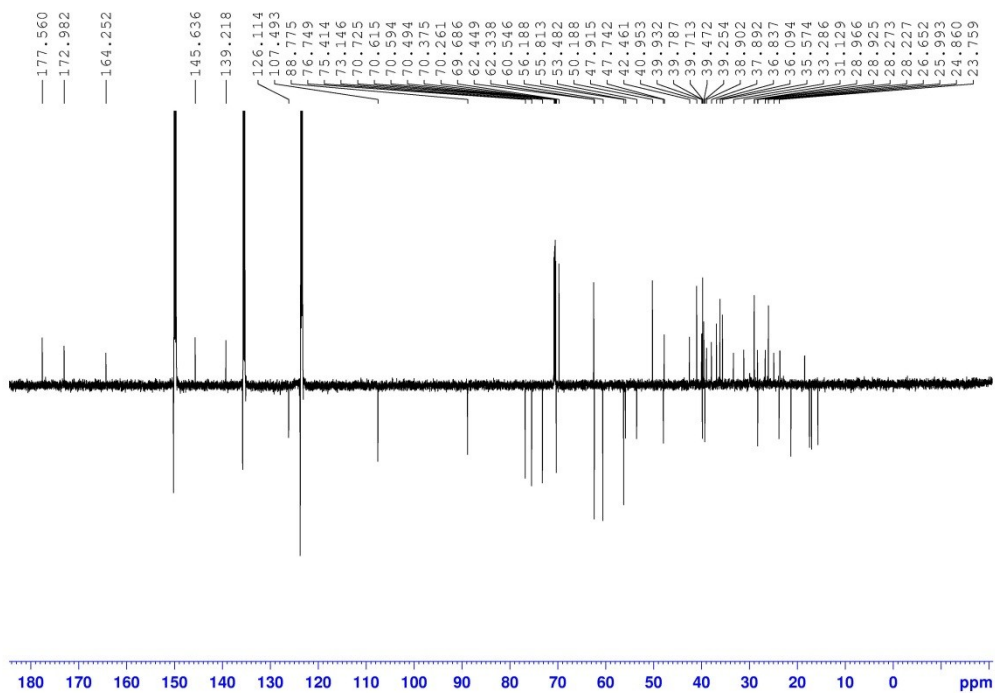

Fig. 6.  $^{13}\text{C}$  NMR of compound VI

CON-5-1\_151021133841 #6 RT: 0.09 AV: 1 NL: 5.96E5  
 T: FTMS + p ESI Full ms [50.00-2000.00]

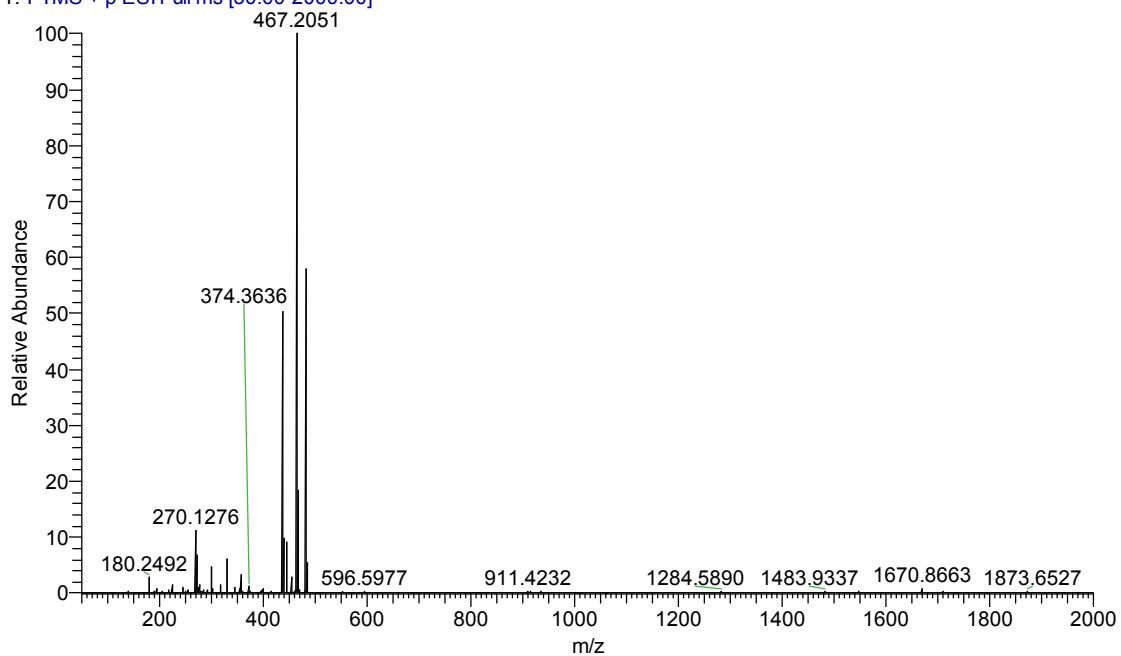

Fig. 7. HRMS of compound III

A-U-9-BIOTIN-1\_151019131116 #1 RT: 0.01 AV: 1 NL: 3.23E7  
T: FTMS + p ESI Full ms [95.00-2000.00]

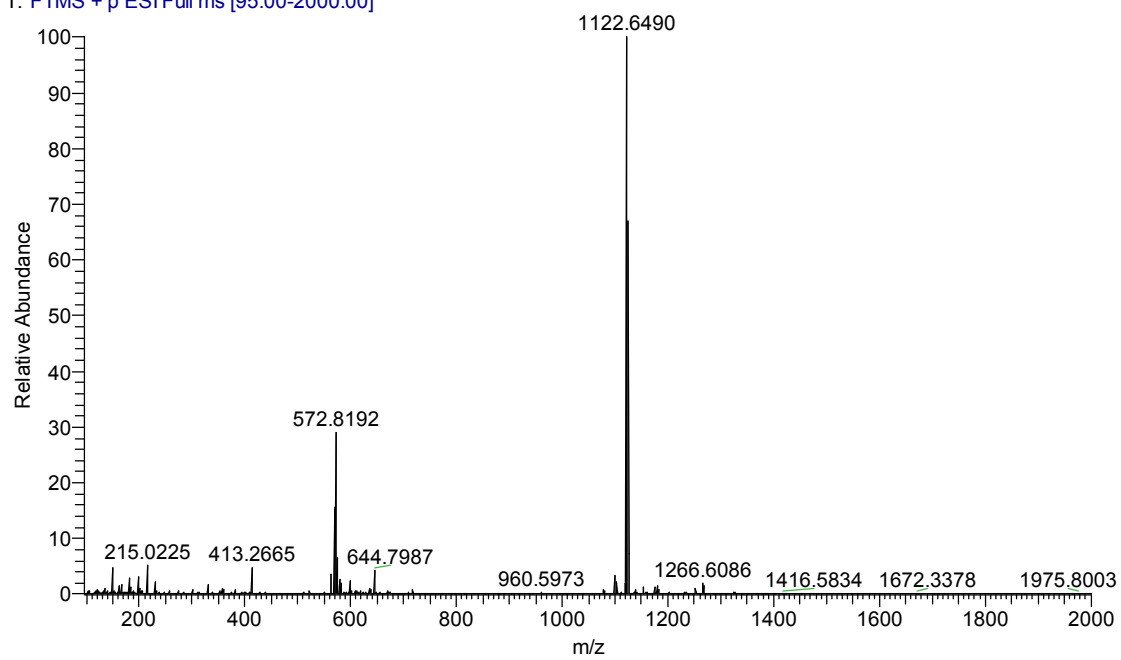

**Fig. 8.** HRMS of compound VI
